# Supplementary material for: Body composition and mortality from middle to old age: a prospective cohort study from the UK Biobank
Source: Springer Nature journal article supplement (doi:10.1038/s41366-023-01314-4), 2023-04-22

## SUPPLEMENT

### **How does age modify the association between adiposity and mortality? A prospective cohort study from the UK Biobank using flexible parametric survival models**

#### **Content:**

**Supplementary Table 1.** Strengthening the Reporting of Observational Studies in Epidemiology (STROBE) checklist of items that should be included in reports of cohort studies.

**Supplementary Table 2.** Description of variables included from UK Biobank Data Showcase.

**Supplementary Figure 1.** Number of participants in each step of the inclusion and exclusion process.

**Supplementary Figure 2.** Distribution of deaths by age at death in the total sample (n=369,752; 10,660 deaths).

**Supplementary Table 3.** Characteristics of participants by strata of Fat Mass Index.

**Supplementary Table 4.** Characteristics of participants by strata of Lean Mass Index.

**Supplementary Table 5.** Characteristics of participants by strata of waist circumference.

**Supplementary Table 6.** Characteristics of participants by strata of Body Fat Percentage.

**Supplementary Table 7.** Bivariate correlations for the total sample, sex and age strata.

**Supplementary Figure 3.** Time-varying hazard ratios by categories of waist circumference and body fat percentage.

**Supplementary Figure 4.** Time-varying hazard ratios stratified for women and men.

**Supplementary Figure 5.** Time-varying hazard ratios in never smokers by categories of waist circumference and body fat percentage.

**Supplementary Figure 6.** Time-varying hazard ratios in people who reported no weight change in previous year to the baseline assessment.

**Supplementary Table 1. Strengthening the Reporting of Observational Studies in Epidemiology (STROBE) checklist of items that should be included in reports of cohort studies.**

|                           | <b>Item No</b> | <b>Recommendation</b>                                                                                                                                                                | <b>Location</b>                                                                                                                                         |
|---------------------------|----------------|--------------------------------------------------------------------------------------------------------------------------------------------------------------------------------------|---------------------------------------------------------------------------------------------------------------------------------------------------------|
| <b>Title and abstract</b> | 1              | (a) Indicate the study's design with a commonly used term in the title or the abstract                                                                                               | Title page (page 1)                                                                                                                                     |
|                           |                | (b) Provide in the abstract an informative and balanced summary of what was done and what was found                                                                                  | Abstract (page 2)                                                                                                                                       |
| <b>Introduction</b>       |                |                                                                                                                                                                                      |                                                                                                                                                         |
| Background/rationale      | 2              | Explain the scientific background and rationale for the investigation being reported                                                                                                 | Introduction, paragraphs 1-3 (page 3)                                                                                                                   |
| Objectives                | 3              | State specific objectives, including any prespecified hypotheses                                                                                                                     | Introduction, last paragraph (page 3)                                                                                                                   |
| <b>Methods</b>            |                |                                                                                                                                                                                      |                                                                                                                                                         |
| Study design              | 4              | Present key elements of study design early in the paper                                                                                                                              | Methods, first paragraph (page 4)                                                                                                                       |
| Setting                   | 5              | Describe the setting, locations, and relevant dates, including periods of recruitment, exposure, follow-up, and data collection                                                      | Methods, first paragraph (page 4)                                                                                                                       |
| Participants              | 6              | (a) Give the eligibility criteria, and the sources and methods of selection of participants. Describe methods of follow-up                                                           | Methods, first paragraph (page 4); "Measures" section, "mortality" subsection (pages 4,5); "statistical analysis section", second paragraph (pages 5,6) |
|                           |                | (b) For matched studies, give matching criteria and number of exposed and unexposed                                                                                                  | NA                                                                                                                                                      |
| Variables                 | 7              | Clearly define all outcomes, exposures, predictors, potential confounders, and effect modifiers. Give diagnostic criteria, if applicable                                             | Methods, "Measures" section (page 4)                                                                                                                    |
| Data sources/measurement  | 8*             | For each variable of interest, give sources of data and details of methods of assessment (measurement). Describe comparability of assessment methods if there is more than one group | Methods, "Measures" section (page 4); Supplementary Table 1                                                                                             |
| Bias                      | 9              | Describe any efforts to address potential sources of bias                                                                                                                            | Methods, "statistical analysis" section, second and third paragraphs (pages 5,6)                                                                        |
| Study size                | 10             | Explain how the study size was arrived at                                                                                                                                            | Methods, last paragraph of "covariates" section (page 5) and "statistical analysis" section, second paragraph (page 6).                                 |
| Quantitative variables    | 11             | Explain how quantitative variables were handled in the analyses. If applicable, describe which groupings were chosen and why                                                         | Methods, "statistical analyses" section (page 5). Supplementary Table 1.                                                                                |
| Statistical methods       | 12             | (a) Describe all statistical methods, including those used to control for confounding                                                                                                | Methods, "statistical analyses" section (pages 5,6).                                                                                                    |
|                           |                | (b) Describe any methods used to examine subgroups and interactions                                                                                                                  | Methods, "statistical analyses" section, third paragraph (page 6).                                                                                      |
|                           |                | (c) Explain how missing data were addressed                                                                                                                                          | Methods, last paragraph of "covariates" section (page 5).                                                                                               |
|                           |                | (d) If applicable, explain how loss to follow-up was addressed                                                                                                                       | Methods, "statistical analyses" section (page 6).                                                                                                       |
|                           |                | (e) Describe any sensitivity analyses                                                                                                                                                | Methods, "statistical analyses" section, third paragraph (page 6).                                                                                      |

**Results**

|                           |                |                                                                                                                                                                                                                                                                                                                                                                                                               |                                                                                                                                                    |
|---------------------------|----------------|---------------------------------------------------------------------------------------------------------------------------------------------------------------------------------------------------------------------------------------------------------------------------------------------------------------------------------------------------------------------------------------------------------------|----------------------------------------------------------------------------------------------------------------------------------------------------|
| Participants              | 13*            | (a) Report numbers of individuals at each stage of study—eg numbers potentially eligible, examined for eligibility, confirmed eligible, included in the study, completing follow-up, and analysed<br>(b) Give reasons for non-participation at each stage<br>(c) Consider use of a flow diagram                                                                                                               | Supplementary Figure 1<br>Supplementary Figure 1<br>Supplementary Figure 1                                                                         |
| Descriptive data          | 14*            | (a) Give characteristics of study participants (eg demographic, clinical, social) and information on exposures and potential confounders<br>(b) Indicate number of participants with missing data for each variable of interest<br>(c) Summarise follow-up time (eg, average and total amount)                                                                                                                | Table 1 and supplementary tables 2-5<br>Table 1 and supplementary figure 1<br>Results, first paragraph (page 6)                                    |
| Outcome data              | 15*            | Report numbers of outcome events or summary measures over time                                                                                                                                                                                                                                                                                                                                                | Results, first paragraph (page 6) and Supplementary Figure 2.                                                                                      |
| Main results              | 16             | (a) Give unadjusted estimates and, if applicable, confounder-adjusted estimates and their precision (eg, 95% confidence interval). Make clear which confounders were adjusted for and why they were included<br>(b) Report category boundaries when continuous variables were categorized<br>(c) If relevant, consider translating estimates of relative risk into absolute risk for a meaningful time period | Results section (pages 6-8), Figures 1 and 2, and Supplementary Figures 3-6<br>Results section (pages 6-8), Table 1 and supplementary files.<br>NA |
| Other analyses            | 17             | Report other analyses done—eg analyses of subgroups and interactions, and sensitivity analyses                                                                                                                                                                                                                                                                                                                | Results (pages 6-8), Figure 2 and supplementary figures 3-6                                                                                        |
| <b>Discussion</b>         |                |                                                                                                                                                                                                                                                                                                                                                                                                               |                                                                                                                                                    |
| Key results               | 18             | Summarise key results with reference to study objectives                                                                                                                                                                                                                                                                                                                                                      | Discussion paragraphs 1, 2, 3 (page 8), and 5 (page 9)                                                                                             |
| Limitations               | 19             | Discuss limitations of the study, taking into account sources of potential bias or imprecision. Discuss both direction and magnitude of any potential bias                                                                                                                                                                                                                                                    | Discussion paragraph 7 (pages 9,10)                                                                                                                |
| Interpretation            | 20             | Give a cautious overall interpretation of results considering objectives, limitations, multiplicity of analyses, results from similar studies, and other relevant evidence                                                                                                                                                                                                                                    | Discussion section (pages 8-10)                                                                                                                    |
| Generalisability          | 21             | Discuss the generalisability (external validity) of the study results                                                                                                                                                                                                                                                                                                                                         | Discussion, “strengths and limitation” section (pages 9, 10)                                                                                       |
| <b>Other information</b>  |                |                                                                                                                                                                                                                                                                                                                                                                                                               |                                                                                                                                                    |
| Funding                   | 22             | Give the source of funding and the role of the funders for the present study and, if applicable, for the original study on which the present article is based                                                                                                                                                                                                                                                 | NA                                                                                                                                                 |
|                           | <b>Item No</b> | <b>Recommendation</b>                                                                                                                                                                                                                                                                                                                                                                                         | <b>Location</b>                                                                                                                                    |
| <b>Title and abstract</b> | 1              | (a) Indicate the study’s design with a commonly used term in the title or the abstract<br>(b) Provide in the abstract an informative and balanced summary of what was done and what was found                                                                                                                                                                                                                 | Title page<br>Abstract                                                                                                                             |
| <b>Introduction</b>       |                |                                                                                                                                                                                                                                                                                                                                                                                                               |                                                                                                                                                    |
| Background/rationale      | 2              | Explain the scientific background and rationale for the investigation being reported                                                                                                                                                                                                                                                                                                                          | Introduction, paragraphs 1-3                                                                                                                       |
| Objectives                | 3              | State specific objectives, including any prespecified hypotheses                                                                                                                                                                                                                                                                                                                                              | Introduction, last paragraph                                                                                                                       |
| <b>Methods</b>            |                |                                                                                                                                                                                                                                                                                                                                                                                                               |                                                                                                                                                    |
| Study design              | 4              | Present key elements of study design early in the paper                                                                                                                                                                                                                                                                                                                                                       | Methods, first paragraph                                                                                                                           |

|                              |     |                                                                                                                                                                                                              |                                                                                                                        |
|------------------------------|-----|--------------------------------------------------------------------------------------------------------------------------------------------------------------------------------------------------------------|------------------------------------------------------------------------------------------------------------------------|
| Setting                      | 5   | Describe the setting, locations, and relevant dates, including periods of recruitment, exposure, follow-up, and data collection                                                                              | Methods, first paragraph                                                                                               |
| Participants                 | 6   | (a) Give the eligibility criteria, and the sources and methods of selection of participants. Describe methods of follow-up                                                                                   | Methods, first paragraph; “Measures” section, “mortality” subsection; “statistical analysis section”, second paragraph |
|                              |     | (b) For matched studies, give matching criteria and number of exposed and unexposed                                                                                                                          | Not applicable                                                                                                         |
| Variables                    | 7   | Clearly define all outcomes, exposures, predictors, potential confounders, and effect modifiers. Give diagnostic criteria, if applicable                                                                     | Methods, “Measures” section                                                                                            |
| Data sources/<br>measurement | 8*  | For each variable of interest, give sources of data and details of methods of assessment (measurement). Describe comparability of assessment methods if there is more than one group                         | Methods, “Measures” section; Supplementary Table 1                                                                     |
| Bias                         | 9   | Describe any efforts to address potential sources of bias                                                                                                                                                    | Methods, “statistical analysis” section, second and third paragraphs                                                   |
| Study size                   | 10  | Explain how the study size was arrived at                                                                                                                                                                    | Methods, last paragraph of “covariates” section and “statistical analysis” section, second paragraph.                  |
| Quantitative variables       | 11  | Explain how quantitative variables were handled in the analyses. If applicable, describe which groupings were chosen and why                                                                                 | Methods, “statistical analyses” section. Supplementary Table 1.                                                        |
| Statistical methods          | 12  | (a) Describe all statistical methods, including those used to control for confounding                                                                                                                        | Methods, “statistical analyses” section                                                                                |
|                              |     | (b) Describe any methods used to examine subgroups and interactions                                                                                                                                          | Methods, “statistical analyses” section, third paragraph                                                               |
|                              |     | (c) Explain how missing data were addressed                                                                                                                                                                  | Methods, last paragraph of “covariates” section                                                                        |
|                              |     | (d) If applicable, explain how loss to follow-up was addressed                                                                                                                                               | Methods, “statistical analyses” section                                                                                |
|                              |     | (e) Describe any sensitivity analyses                                                                                                                                                                        | Methods, “statistical analyses” section, third paragraph                                                               |
| <b>Results</b>               |     |                                                                                                                                                                                                              |                                                                                                                        |
| Participants                 | 13* | (a) Report numbers of individuals at each stage of study—eg numbers potentially eligible, examined for eligibility, confirmed eligible, included in the study, completing follow-up, and analysed            | Supplementary Figure 1                                                                                                 |
|                              |     | (b) Give reasons for non-participation at each stage                                                                                                                                                         | Supplementary Figure 1                                                                                                 |
|                              |     | (c) Consider use of a flow diagram                                                                                                                                                                           | Supplementary Figure 1                                                                                                 |
| Descriptive data             | 14* | (a) Give characteristics of study participants (eg demographic, clinical, social) and information on exposures and potential confounders                                                                     | Table 1 and supplementary tables 2-5                                                                                   |
|                              |     | (b) Indicate number of participants with missing data for each variable of interest                                                                                                                          | Table 1 and supplementary figure 1                                                                                     |
|                              |     | (c) Summarise follow-up time (eg, average and total amount)                                                                                                                                                  | Results, first paragraph                                                                                               |
| Outcome data                 | 15* | Report numbers of outcome events or summary measures over time                                                                                                                                               | Results, first paragraph and Supplementary Figure 2.                                                                   |
| Main results                 | 16  | (a) Give unadjusted estimates and, if applicable, confounder-adjusted estimates and their precision (eg, 95% confidence interval). Make clear which confounders were adjusted for and why they were included | Results text, Figures 1 and 2, and Supplementary Figures 3-6                                                           |
|                              |     | (b) Report category boundaries when continuous variables were categorized                                                                                                                                    | Results section, Table 1 and supplementary files.                                                                      |
|                              |     | (c) If relevant, consider translating estimates of relative risk into absolute risk for a meaningful time period                                                                                             | NA                                                                                                                     |
| Other analyses               | 17  | Report other analyses done—eg analyses of subgroups and interactions, and sensitivity analyses                                                                                                               | Results, Figure 2 and supplementary figures 3-6                                                                        |

| <b>Discussion</b>        |    |                                                                                                                                                                            |                                                 |
|--------------------------|----|----------------------------------------------------------------------------------------------------------------------------------------------------------------------------|-------------------------------------------------|
| Key results              | 18 | Summarise key results with reference to study objectives                                                                                                                   | Discussion paragraphs 1, 2, 3, 5                |
| Limitations              | 19 | Discuss limitations of the study, taking into account sources of potential bias or imprecision. Discuss both direction and magnitude of any potential bias                 | Discussion paragraph 7                          |
| Interpretation           | 20 | Give a cautious overall interpretation of results considering objectives, limitations, multiplicity of analyses, results from similar studies, and other relevant evidence | Discussion section                              |
| Generalisability         | 21 | Discuss the generalisability (external validity) of the study results                                                                                                      | Discussion, “strengths and limitation” section. |
| <b>Other information</b> |    |                                                                                                                                                                            |                                                 |
| Funding                  | 22 | Give the source of funding and the role of the funders for the present study and, if applicable, for the original study on which the present article is based              | Funding section                                 |

**Note:** An Explanation and Elaboration article discusses each checklist item and gives methodological background and published examples of transparent reporting. The STROBE checklist is best used in conjunction with this article (freely available on the Web sites of PLoS Medicine at <http://www.plosmedicine.org/>, Annals of Internal Medicine at <http://www.annals.org/>, and Epidemiology at <http://www.epidem.com/>). Information on the STROBE Initiative is available at <http://www.strobe-statement.org>.

**Supplementary Table 2. Description of variables included from UK Biobank Data Showcase.**

| Item                                       | UK Biobank Field ID(s)                   | Measurement item(s)                                                        | Definition/data coding                                                                                                                                                                     | Notes                                                                                                                                                                                                                                                                |
|--------------------------------------------|------------------------------------------|----------------------------------------------------------------------------|--------------------------------------------------------------------------------------------------------------------------------------------------------------------------------------------|----------------------------------------------------------------------------------------------------------------------------------------------------------------------------------------------------------------------------------------------------------------------|
| Alcohol                                    | Combinations of n_20117_0_0 & n_1558_0_0 | (Questionnaire) self-reported drinking status and drinking frequency       | Never = n_20117_0_0 == 0                                                                                                                                                                   | <a href="https://biobank.ndph.ox.ac.uk/showcase/field.cgi?id=20117">https://biobank.ndph.ox.ac.uk/showcase/field.cgi?id=20117</a><br><a href="https://biobank.ndph.ox.ac.uk/showcase/field.cgi?id=1558">https://biobank.ndph.ox.ac.uk/showcase/field.cgi?id=1558</a> |
|                                            |                                          |                                                                            | Previous = n_20117_0_0 == 1                                                                                                                                                                |                                                                                                                                                                                                                                                                      |
|                                            |                                          |                                                                            | Current, <3times/week = 2 if n_20117_0_0 == 2 & (n_1558_0_0 == 3   n_1558_0_0 == 4   n_1558_0_0 == 5                                                                                       |                                                                                                                                                                                                                                                                      |
|                                            |                                          |                                                                            | Current, ≥3times/week = 3 if n_20117_0_0 == 2 & (n_1558_0_0 == 1   n_1558_0_0 == 2                                                                                                         |                                                                                                                                                                                                                                                                      |
| Anorexia, bulimia or other eating disorder | n_20002_0_0 – n_20002_0_28               | (Interview) self-reported anorexia/bulimia/other eating disorder           | if `x`==1470                                                                                                                                                                               | <a href="https://biobank.ndph.ox.ac.uk/showcase/field.cgi?id=20002">https://biobank.ndph.ox.ac.uk/showcase/field.cgi?id=20002</a>                                                                                                                                    |
| Attendance/disability/mobility allowance   | N_6146_0_0                               | (Questionnaire) self-reported attendance, disability or mobility allowance | Attendance allowance =1<br>Disability living allowance = 2<br>Blue badge =3                                                                                                                | <a href="http://biobank.ndph.ox.ac.uk/showcase/field.cgi?id=6146">http://biobank.ndph.ox.ac.uk/showcase/field.cgi?id=6146</a>                                                                                                                                        |
| Birthday                                   | n_34_0_0 & n_52_0_0                      | (Registry, updated by participant) year and month of birth                 | Date set to 15th for all participants                                                                                                                                                      | <a href="https://biobank.ndph.ox.ac.uk/showcase/field.cgi?id=34">https://biobank.ndph.ox.ac.uk/showcase/field.cgi?id=34</a><br><a href="https://biobank.ndph.ox.ac.uk/showcase/field.cgi?id=52">https://biobank.ndph.ox.ac.uk/showcase/field.cgi?id=52</a>           |
| Body mass index                            | n_21001_0_0                              | Measured height and weight                                                 | 18.5-24.9 kg/m <sup>2</sup> (Normal weight) =0<br>25-29.9 kg/m <sup>2</sup> (Overweight) =1<br>30-34.9 kg/m <sup>2</sup> (Obese class I) = 2<br>≥35 kg/m <sup>2</sup> (Obese class II) = 3 | <a href="http://biobank.ndph.ox.ac.uk/showcase/field.cgi?id=21001">http://biobank.ndph.ox.ac.uk/showcase/field.cgi?id=21001</a>                                                                                                                                      |
| Cancer at baseline                         | n_2453_0_0                               | (Questionnaire) self-reported cancer                                       | If `x`==1                                                                                                                                                                                  | <a href="http://biobank.ctu.ox.ac.uk/crystal/coding.cgi?id=6">http://biobank.ctu.ox.ac.uk/crystal/coding.cgi?id=6</a>                                                                                                                                                |
|                                            | n_20001_0_0 – n_20001_0_5                | (Interview) self-reported cancer excluding non-melanoma skin cancer        | If `x` != . & `x` != 1060   `x` != 1061   `x` != 1062   `x` != 1073                                                                                                                        | <a href="http://biobank.ctu.ox.ac.uk/crystal/field.cgi?id=40006">http://biobank.ctu.ox.ac.uk/crystal/field.cgi?id=40006</a>                                                                                                                                          |
|                                            |                                          |                                                                            |                                                                                                                                                                                            | <a href="http://biobank.ctu.ox.ac.uk/crystal/field.cgi?id=40013&amp;nl=1">http://biobank.ctu.ox.ac.uk/crystal/field.cgi?id=40013&amp;nl=1</a>                                                                                                                        |

|                                           |                               |                                                                                                                                                                                                                                                        |                          |                                                                                                                                   |
|-------------------------------------------|-------------------------------|--------------------------------------------------------------------------------------------------------------------------------------------------------------------------------------------------------------------------------------------------------|--------------------------|-----------------------------------------------------------------------------------------------------------------------------------|
|                                           | s_40006_0_0 –<br>s_40006_31_0 | (Cancer Registry) Any cancer-type (C-D48) excluding non-melanoma skin cancers (ICD-10; C44, ICD-9; 173)                                                                                                                                                |                          |                                                                                                                                   |
| Chronic Obstructive Pulmonary Disease     | ts_42016_0_0                  | (Algorithmically defined outcomes)                                                                                                                                                                                                                     | If 'x' < assessment date | <a href="http://biobank.ctsu.ox.ac.uk/crystal/refer.cgi?id=4125">http://biobank.ctsu.ox.ac.uk/crystal/refer.cgi?id=4125</a>       |
|                                           |                               | COPD from self-report or hospital admission EHR                                                                                                                                                                                                        |                          |                                                                                                                                   |
| Country                                   | n_54_0_0                      | (Automatically acquired at participant consent) UK Biobank assessment centre                                                                                                                                                                           |                          | <a href="https://biobank.ndph.ox.ac.uk/showcase/field.cgi?id=54">https://biobank.ndph.ox.ac.uk/showcase/field.cgi?id=54</a>       |
| Chronic/degenerative neurological problem | n_20002_0_0 –<br>n_20002_0_28 | (Interview) self-reported chronic/degenerative neurological problem, Parkinson's disease, dementia/Alzheimer's/cognitive impairment, motor neuron disease, myasthenia gravis, multiple sclerosis, other demyelinating disease (not multiple sclerosis) | if `x`==1258   `x`==1259 | <a href="https://biobank.ndph.ox.ac.uk/showcase/field.cgi?id=20002">https://biobank.ndph.ox.ac.uk/showcase/field.cgi?id=20002</a> |
|                                           |                               |                                                                                                                                                                                                                                                        | `x`==1260   `x`==1261    |                                                                                                                                   |
|                                           |                               |                                                                                                                                                                                                                                                        | `x`==1262   `x`==1263    |                                                                                                                                   |
|                                           |                               |                                                                                                                                                                                                                                                        | `x`== 1397               |                                                                                                                                   |

|                                                   |                            |                                                                                                                                                                                                                                                                                                                                                                                                        |                                                                                                                                                                                      |                                                                                                                                                                                                                                                                                                                                                                                                                     |
|---------------------------------------------------|----------------------------|--------------------------------------------------------------------------------------------------------------------------------------------------------------------------------------------------------------------------------------------------------------------------------------------------------------------------------------------------------------------------------------------------------|--------------------------------------------------------------------------------------------------------------------------------------------------------------------------------------|---------------------------------------------------------------------------------------------------------------------------------------------------------------------------------------------------------------------------------------------------------------------------------------------------------------------------------------------------------------------------------------------------------------------|
| Chronic immunological or systemic diseases        | n_20002_0_0 – n_20002_0_28 | (Interview) self-reported rheumatoid arthritis, vasculitis, giant cell/temporal arteritis, polymyalgia rheumatica, Wegners granulmatosis, microscopic polyarteritis, polyartertis nodosa, systemic lupus erythematosis/sle, sjogren's syndrome/sicca syndrome, dermatopolymyositis, dermatomyositis, polymyositis, scleroderma/systemic sclerosis, chronic fatigue syndrome, antiphospholipid syndrome | if `x`==1464   `x`==1372   `x`==1376   `x`==1377   `x`==1378   `x`==1379   `x`==1380   `x`==1381   `x`==1382   `x`==1383   `x`==1480   `x`==1481   `x`==1384   `x`==1482   `x`==1564 | Individuals reporting; sarcoidosis, connective tissue disorder, Raynaud's phenomenon/disease not excluded                                                                                                                                                                                                                                                                                                           |
|                                                   |                            |                                                                                                                                                                                                                                                                                                                                                                                                        |                                                                                                                                                                                      | Allergy/hypersensitivity/anaphylaxis variables are not considered                                                                                                                                                                                                                                                                                                                                                   |
| Chronic respiratory diseases (not including COPD) | n_20002_0_0 – n_20002_0_28 | (Interview) self-reported bronchiectasis, interstitial lung disease, asbestosis, pulmonary fibrosis, fibrosing alveolitis/unspecified alveolitis, respiratory failure                                                                                                                                                                                                                                  | if `x`==1114   `x`==1115   `x`==1120   `x`==1121   `x`==1122   `x`==1124                                                                                                             | Individuals reporting; other respiratory problems, sleep apnea, pleurisy, pneumothorax, spontaneous pneumothorax/recurrent pneumothorax, pleural plaques (not known asbestosis), pleural effusion not excluded as these are not chronic or not debilitating respiratory infection, pneumonia, lung abscess, empyema not included as individuals with these conditions are unlikely to attend the examination center |
| Chronic widespread pain                           | n_2956_0_0                 | (Questionnaire)                                                                                                                                                                                                                                                                                                                                                                                        | if `x`==1                                                                                                                                                                            | doi: 10.1007/s11657-015-0252-1                                                                                                                                                                                                                                                                                                                                                                                      |
|                                                   |                            | "Have you had pains all over the body for more than 3 months?"                                                                                                                                                                                                                                                                                                                                         |                                                                                                                                                                                      |                                                                                                                                                                                                                                                                                                                                                                                                                     |
| Cardiovascular disease at baseline                | n_42000_0_0                | (Algorithmically defined outcomes)                                                                                                                                                                                                                                                                                                                                                                     | ICD-10:                                                                                                                                                                              | <a href="http://biobank.cts.ox.ac.uk/crystal/refer.cgi?id=461">http://biobank.cts.ox.ac.uk/crystal/refer.cgi?id=461</a>                                                                                                                                                                                                                                                                                             |
|                                                   | n_42006_0_0                | myocardial infarction, stroke, ischaemic stroke, subarachnoid haemorrhage, brain haemorrhage                                                                                                                                                                                                                                                                                                           | MI: I21, I22, I23, I24.1, I25.2                                                                                                                                                      | <a href="http://biobank.cts.ox.ac.uk/crystal/refer.cgi?id=462">http://biobank.cts.ox.ac.uk/crystal/refer.cgi?id=462</a>                                                                                                                                                                                                                                                                                             |
|                                                   | n_42008_0_0<br>n_42010_0_0 |                                                                                                                                                                                                                                                                                                                                                                                                        | Subarachnoid haemorrhage: I60                                                                                                                                                        | <a href="https://biobank.ndph.ox.ac.uk/showcase/field.cgi?id=42008">https://biobank.ndph.ox.ac.uk/showcase/field.cgi?id=42008</a><br><a href="https://biobank.ndph.ox.ac.uk/showcase/field.cgi?id=42010">https://biobank.ndph.ox.ac.uk/showcase/field.cgi?id=42010</a>                                                                                                                                              |



|                                                |                                                            |                                                                            |                                                                                        |                                                                                                                               |
|------------------------------------------------|------------------------------------------------------------|----------------------------------------------------------------------------|----------------------------------------------------------------------------------------|-------------------------------------------------------------------------------------------------------------------------------|
|                                                | n_42012_0_0                                                |                                                                            | Intracerebral haemorrhage: I61                                                         |                                                                                                                               |
|                                                |                                                            |                                                                            | Cerebral infarction: I63                                                               |                                                                                                                               |
|                                                |                                                            |                                                                            | Stroke, not specified as haemorrhage or                                                |                                                                                                                               |
|                                                |                                                            |                                                                            | Infarction: I64.X                                                                      |                                                                                                                               |
|                                                |                                                            |                                                                            |                                                                                        |                                                                                                                               |
|                                                |                                                            |                                                                            | ICD-9:                                                                                 |                                                                                                                               |
|                                                |                                                            |                                                                            | MI: 410, 411, 412.X, 429.79                                                            |                                                                                                                               |
|                                                |                                                            |                                                                            | Subarachnoid haemorrhage: 430.X                                                        |                                                                                                                               |
|                                                |                                                            |                                                                            | Intracerebral haemorrhage: 431.X                                                       |                                                                                                                               |
|                                                |                                                            |                                                                            | Occlusion of cerebral arteries: 434.X                                                  |                                                                                                                               |
|                                                |                                                            |                                                                            | Cerebral thrombosis: 434.0                                                             |                                                                                                                               |
|                                                |                                                            |                                                                            | Cerebral embolism: 434.1                                                               |                                                                                                                               |
|                                                |                                                            |                                                                            | Cerebral artery occlusion, unspecified: 434.9                                          |                                                                                                                               |
|                                                |                                                            |                                                                            | Acute, but ill-defined, cerebrovascular disease: 436.X                                 |                                                                                                                               |
|                                                | s_41270_0_0<br>ts_41280_0_0<br>s_41271_0_0<br>ts_41281_0_0 | (Hospital In-patient data)                                                 | ICD-10:                                                                                | <a href="http://biobank.ctsu.ox.ac.uk/crystal/field.cgi?id=41270">http://biobank.ctsu.ox.ac.uk/crystal/field.cgi?id=41270</a> |
|                                                |                                                            | Angina, heart failure                                                      | Angina (I20): I20.0, I20.1, I20.8, I20.9                                               |                                                                                                                               |
|                                                |                                                            |                                                                            | Heart failure (I11, I13, I50): I50.0, I50.1, I50.9, I11.0, I11.9, I13.0, I13.2, I13.9) |                                                                                                                               |
|                                                |                                                            |                                                                            | ICD-9:                                                                                 |                                                                                                                               |
|                                                |                                                            |                                                                            | Angina: 4139                                                                           |                                                                                                                               |
|                                                |                                                            |                                                                            | Heart failure: 4280, 4281, 4289                                                        |                                                                                                                               |
| Date lost to follow-up                         | ts_191_0_0                                                 | (multiple sources) date which a person is believed to be lost to follow-up |                                                                                        | <a href="http://biobank.ndph.ox.ac.uk/showcase/field.cgi?id=191">http://biobank.ndph.ox.ac.uk/showcase/field.cgi?id=191</a>   |
| Date of attending UK Biobank assessment centre | ts_53_0_0                                                  | (Acquired at UK Biobank Reception)                                         | Wales = if `x`== 11003   `x`==11022   `x`==11023                                       | <a href="http://biobank.ndph.ox.ac.uk/showcase/field.cgi?id=54">http://biobank.ndph.ox.ac.uk/showcase/field.cgi?id=54</a>     |
|                                                |                                                            |                                                                            | Scotland = if `x`== 11005   `x`==11004                                                 |                                                                                                                               |
|                                                |                                                            |                                                                            | England = if none of the above satisfied                                               |                                                                                                                               |

|                                           |                                       |                                                               |                                                                                                                    |                                                                                                                                                           |
|-------------------------------------------|---------------------------------------|---------------------------------------------------------------|--------------------------------------------------------------------------------------------------------------------|-----------------------------------------------------------------------------------------------------------------------------------------------------------|
| Date of Death                             | ts_40000_0_0                          | (Death register) date of death                                |                                                                                                                    |                                                                                                                                                           |
| Depression                                | n_20002_0_0 –<br>n_20002_0_28         | (Interview) self-reported depression                          | If 'x'== 1286                                                                                                      | Not including post-natal depression                                                                                                                       |
| Diabetes (excluding gestational diabetes) | n_2443_0_0                            | (Questionnaire) self-reported diabetes                        | If 'x'==1 & n_4041_0_0 (gestational diabetes) !=1                                                                  |                                                                                                                                                           |
|                                           | N_6153_0_0 –<br>n_6153_0_3<br>(women) | (Questionnaire) self-reported Insulin user                    | If 'x'==3                                                                                                          |                                                                                                                                                           |
|                                           | n_6177_0_0 –<br>n_6177_0_2<br>(men)   |                                                               |                                                                                                                    |                                                                                                                                                           |
|                                           | n_20002_0_0 –<br>n_20002_0_28         | (Interview) self-reported diabetes                            | if 'x'== 1220  <br>'x'== 1222   'x'==1223                                                                          |                                                                                                                                                           |
|                                           | n_30750_0_0                           | (Biochemistry) HbA1c                                          | If 'x' ≥48 mmol/l                                                                                                  |                                                                                                                                                           |
| Duration of moderate activity             | n_894_0_0                             | (Questionnaire) minutes of moderate activity on a typical day | IPAQ data processing                                                                                               | <a href="http://biobank.ndph.ox.ac.uk/showcase/showcase/docs/ipaq_analysis.pdf">http://biobank.ndph.ox.ac.uk/showcase/showcase/docs/ipaq_analysis.pdf</a> |
| Duration of vigorous activity             | n_914_0_0                             | (Questionnaire) minutes of vigorous activity on a typical day | IPAQ data processing                                                                                               | <a href="http://biobank.ndph.ox.ac.uk/showcase/showcase/docs/ipaq_analysis.pdf">http://biobank.ndph.ox.ac.uk/showcase/showcase/docs/ipaq_analysis.pdf</a> |
| Duration of walks                         | n_874_0_0                             | (Questionnaire) minutes of walking on a typical day           | IPAQ data processing                                                                                               | <a href="http://biobank.ndph.ox.ac.uk/showcase/showcase/docs/ipaq_analysis.pdf">http://biobank.ndph.ox.ac.uk/showcase/showcase/docs/ipaq_analysis.pdf</a> |
| Education                                 | n_6138_0_0 -<br>n_6138_0_5            | (Questionnaire) self-reported qualifications                  | College/University degree = if 'x'== 1                                                                             | 7 answering options                                                                                                                                       |
|                                           |                                       |                                                               | A/AS/O/GCSE/CSE/NVQ/HND/HNC/Other professional qualifications = if 'x'== 2   'x'== 3   'x'== 4   'x'== 5   'x'== 6 | structure which accounts for all                                                                                                                          |
|                                           |                                       |                                                               | No qualifications= if 'x'== -7                                                                                     | Original categories do not have a clear ordinal                                                                                                           |
| Employment                                | n_6142_0_0 -<br>n_6142_0_0            | (Questionnaire) self-reported 'current situation'             | Employed = if 'x'== 1                                                                                              |                                                                                                                                                           |
| Ethnicity                                 | n_21000_0_0                           | (Questionnaire) amalgam of sequential branching questions     | White = if 'x'==1   'x'==1001   'x'==1002   'x'==1003                                                              |                                                                                                                                                           |
|                                           |                                       |                                                               | Other = if above not satisfied                                                                                     |                                                                                                                                                           |

|                                           |                                                      |                                                                                                                                        |                                                                                                                                                                                                      |                                                                                                                                                                                                                                                                        |
|-------------------------------------------|------------------------------------------------------|----------------------------------------------------------------------------------------------------------------------------------------|------------------------------------------------------------------------------------------------------------------------------------------------------------------------------------------------------|------------------------------------------------------------------------------------------------------------------------------------------------------------------------------------------------------------------------------------------------------------------------|
| Fat Mass Index                            | n_23100_0_0<br>(whole body fat mass)                 | Bioimpedance measurements                                                                                                              | Fat mass index = whole body fat / height <sup>2</sup><br>Maintaining the sex-specific distribution in the BMI categories, categorization as:<br>low =0<br>medium-low =1<br>medium-high =2<br>high =3 | <a href="https://biobank.ndph.ox.ac.uk/showcase/field.cgi?id=23278">https://biobank.ndph.ox.ac.uk/showcase/field.cgi?id=23278</a><br><a href="https://biobank.ndph.ox.ac.uk/showcase/field.cgi?id=12144">https://biobank.ndph.ox.ac.uk/showcase/field.cgi?id=12144</a> |
|                                           | n_12144_0_0<br>(height)                              | Body size measurements                                                                                                                 |                                                                                                                                                                                                      |                                                                                                                                                                                                                                                                        |
| Fruit/vegetable intake<br>(servings/week) | n_1289_0_0<br>n_1299_0_0<br>n_1309_0_0<br>n_1319_0_0 | (Questionnaire) self-reported frequency of cooked vegetable intake, salad/raw vegetable intake, fresh fruit intake, dried fruit intake | Less than one = 0.5                                                                                                                                                                                  | Included as part of diet pattern variable                                                                                                                                                                                                                              |
|                                           |                                                      |                                                                                                                                        | Otherwise, number of reported tablespoons (vegetables) and pieces (fruit) as reported                                                                                                                |                                                                                                                                                                                                                                                                        |
|                                           |                                                      |                                                                                                                                        |                                                                                                                                                                                                      |                                                                                                                                                                                                                                                                        |
| General health                            | n_2178_0_0                                           | (Questionnaire) Self-perceived overall health rating                                                                                   | Poor = 4                                                                                                                                                                                             |                                                                                                                                                                                                                                                                        |
| Healthy diet pattern                      | Derived for this dataset                             | Composite of self-reported fish, fruit/vegetable and processed/red meat intake                                                         | 1 if meeting 2 of the 3 food item targets                                                                                                                                                            | <b>Fish: &gt;=2 servings/week, including 1 with oily fish:</b><br><a href="https://www.nhs.uk/live-well/eat-well/eight-tips-for-healthy-eating/">https://www.nhs.uk/live-well/eat-well/eight-tips-for-healthy-eating/</a>                                              |
|                                           |                                                      |                                                                                                                                        | 0 if not meeting 2 of the targets                                                                                                                                                                    | <b>Fruit/vegetables: &gt;=5 servings/day:</b> <a href="https://www.nhs.uk/live-well/eat-well/5-a-day-what-counts/">https://www.nhs.uk/live-well/eat-well/5-a-day-what-counts/</a> + doi: 10.1016/S2468-2667(18)30200-7                                                 |
|                                           |                                                      |                                                                                                                                        |                                                                                                                                                                                                      |                                                                                                                                                                                                                                                                        |
|                                           |                                                      |                                                                                                                                        |                                                                                                                                                                                                      | Processed/red meat intake: <= 3 servings of red meat/week & <=1 serving of processed meat/week:<br><a href="https://www.ncbi.nlm.nih.gov/pubmed/30467019">https://www.ncbi.nlm.nih.gov/pubmed/30467019</a> + doi: 10.1016/S2468-2667(18)30200-7                        |
| Hypertension                              | n_6150_0_0 –<br>n_6150_0_3                           | (Questionnaire) self-reported High Blood Pressure                                                                                      | If 'x'==4                                                                                                                                                                                            |                                                                                                                                                                                                                                                                        |
|                                           | N_6153_0_0 –<br>n_6153_0_3<br>(women)                | (Questionnaire) self-reported blood pressure medication                                                                                | If 'x'==2                                                                                                                                                                                            |                                                                                                                                                                                                                                                                        |
|                                           | n_6177_0_0 –<br>n_6177_0_2<br>(men)                  |                                                                                                                                        |                                                                                                                                                                                                      |                                                                                                                                                                                                                                                                        |
|                                           | n_4080_0_0<br>n_4079_0_0                             | Measured (manual or automated) systolic and diastolic BP                                                                               | If SBP≥140   DBP≥90                                                                                                                                                                                  |                                                                                                                                                                                                                                                                        |
|                                           | n_93_0_1<br>n_94_0_1                                 |                                                                                                                                        |                                                                                                                                                                                                      |                                                                                                                                                                                                                                                                        |
|                                           | n_20002_0_0 –<br>n_20002_0_28                        | (Interview) self-reported hypertension, essential hypertension                                                                         | if 'x'==1065   'x'==1072                                                                                                                                                                             |                                                                                                                                                                                                                                                                        |

|                                             |                                                                |                                                                                                                             |                                                                                                                                               |                                                                                                                                                                                                                                                                        |
|---------------------------------------------|----------------------------------------------------------------|-----------------------------------------------------------------------------------------------------------------------------|-----------------------------------------------------------------------------------------------------------------------------------------------|------------------------------------------------------------------------------------------------------------------------------------------------------------------------------------------------------------------------------------------------------------------------|
| Income                                      | n_738_0_0                                                      | (Questionnaire) Average total household income before tax                                                                   | <£18,000 = 0<br>£18,000–51,999 = 1<br>>£52,000 = 2<br>Missing = 3                                                                             | <a href="http://biobank.ndph.ox.ac.uk/showcase/field.cgi?id=738">http://biobank.ndph.ox.ac.uk/showcase/field.cgi?id=738</a>                                                                                                                                            |
| Lean Mass Index                             | n_23279_0_0<br>(total fat-free mass)                           | Bioimpedance measurements                                                                                                   | Lean mass index = whole body fat / height <sup>2</sup><br>Maintaining the sex-specific distribution in the BMI categories, categorization as: | <a href="https://biobank.ndph.ox.ac.uk/showcase/field.cgi?id=23279">https://biobank.ndph.ox.ac.uk/showcase/field.cgi?id=23279</a><br><a href="https://biobank.ndph.ox.ac.uk/showcase/field.cgi?id=12144">https://biobank.ndph.ox.ac.uk/showcase/field.cgi?id=12144</a> |
|                                             | n_12144_0_0<br>(height)                                        | Body size measurements                                                                                                      | low = 0<br>medium-low = 1<br>medium-high = 2<br>high = 3                                                                                      |                                                                                                                                                                                                                                                                        |
| Liver failure/cirrhosis                     | n_20002_0_0 –<br>n_20002_0_28                                  | (Interview) self-reported liver failure/cirrhosis, primary biliary cirrhosis, alcoholic liver disease / alcoholic cirrhosis | if `x`==1158   `x`==1506   `x`==1604                                                                                                          |                                                                                                                                                                                                                                                                        |
| Marital status                              | Combinations of<br>n_709_0_0 and<br>n_6414_0_0 -<br>n_6414_0_4 | (Questionnaire) self-reported individuals (including yourself) living in household and relation to those individuals        | Not married/living with partner = if n_709_0_0 == 1                                                                                           |                                                                                                                                                                                                                                                                        |
|                                             |                                                                |                                                                                                                             | Married/living with partner = if n_709_0_0 > 1 & n_6414_0_0 - n_6414_0_4 == 1                                                                 |                                                                                                                                                                                                                                                                        |
|                                             |                                                                |                                                                                                                             |                                                                                                                                               |                                                                                                                                                                                                                                                                        |
| No. of days/week walking                    | n_864_0_0                                                      | (Questionnaire) days of ≥10-minute walking in last week                                                                     | IPAQ data processing                                                                                                                          | <a href="http://biobank.ndph.ox.ac.uk/showcase/showcase/docs/ipaq_analysis.pdf">http://biobank.ndph.ox.ac.uk/showcase/showcase/docs/ipaq_analysis.pdf</a>                                                                                                              |
| No. of days/week moderate physical activity | n_884_0_0                                                      | (Questionnaire) days of ≥10-minute moderate activity in last week                                                           | IPAQ data processing                                                                                                                          | <a href="http://biobank.ndph.ox.ac.uk/showcase/showcase/docs/ipaq_analysis.pdf">http://biobank.ndph.ox.ac.uk/showcase/showcase/docs/ipaq_analysis.pdf</a>                                                                                                              |
| No. of days/week vigorous physical activity | n_904_0_0                                                      | (Questionnaire) days of ≥10-minute vigorous activity in last week                                                           | IPAQ data processing                                                                                                                          | <a href="http://biobank.ndph.ox.ac.uk/showcase/showcase/docs/ipaq_analysis.pdf">http://biobank.ndph.ox.ac.uk/showcase/showcase/docs/ipaq_analysis.pdf</a>                                                                                                              |
| Non-oily Fish intake (servings/week)        | n_1339_0_0                                                     | (Questionnaire) self-reported frequency of non-oily fish intake                                                             | Never = 0                                                                                                                                     | Included as part of diet pattern variable                                                                                                                                                                                                                              |
|                                             |                                                                |                                                                                                                             | less than once a week = 0.5                                                                                                                   |                                                                                                                                                                                                                                                                        |
|                                             |                                                                |                                                                                                                             | Once a week = 1                                                                                                                               |                                                                                                                                                                                                                                                                        |
|                                             |                                                                |                                                                                                                             | 2-4 times a week = 3                                                                                                                          |                                                                                                                                                                                                                                                                        |
|                                             |                                                                |                                                                                                                             | 5-6 times a week = 5.5                                                                                                                        |                                                                                                                                                                                                                                                                        |
|                                             |                                                                |                                                                                                                             | Once or more daily = 7                                                                                                                        |                                                                                                                                                                                                                                                                        |
| Oily Fish intake (servings/week)            | n_1329_0_0                                                     | (Questionnaire) self-reported frequency of oily fish intake                                                                 | Never = 0                                                                                                                                     | Included as part of diet pattern variable                                                                                                                                                                                                                              |
|                                             |                                                                |                                                                                                                             | less than once a week = 0.5                                                                                                                   |                                                                                                                                                                                                                                                                        |
|                                             |                                                                |                                                                                                                             | Once a week = 1                                                                                                                               |                                                                                                                                                                                                                                                                        |

|                                       |                            |                                                                                                                                                        |                             |                                                                                                                                 |
|---------------------------------------|----------------------------|--------------------------------------------------------------------------------------------------------------------------------------------------------|-----------------------------|---------------------------------------------------------------------------------------------------------------------------------|
|                                       |                            |                                                                                                                                                        | 2-4 times a week = 3        |                                                                                                                                 |
|                                       |                            |                                                                                                                                                        | 5-6 times a week = 5.5      |                                                                                                                                 |
|                                       |                            |                                                                                                                                                        | Once or more daily = 7      |                                                                                                                                 |
| Primary cause of death                | s_40001_0_0                | (Death register) underlying/primary cause of death                                                                                                     |                             | <a href="http://biobank.ndph.ox.ac.uk/showcase/field.cgi?id=40001">http://biobank.ndph.ox.ac.uk/showcase/field.cgi?id=40001</a> |
| Processed meat (servings/week)        | n_1349_0_0                 | (Questionnaire) self-reported frequency of processed meat intake                                                                                       | Never = 0                   | Included as part of diet pattern variable                                                                                       |
|                                       |                            |                                                                                                                                                        | less than once a week = 0.5 |                                                                                                                                 |
|                                       |                            |                                                                                                                                                        | Once a week = 1             |                                                                                                                                 |
|                                       |                            |                                                                                                                                                        | 2-4 times a week = 3        |                                                                                                                                 |
|                                       |                            |                                                                                                                                                        | 5-6 times a week = 5.5      |                                                                                                                                 |
|                                       |                            |                                                                                                                                                        | Once or more daily = 7      |                                                                                                                                 |
| Psychological or psychiatric problems | n_20002_0_0 – n_20002_0_28 | (Interview) self-reported schizophrenia, mania/bipolar disorder/manic depression, deliberate self-harm/suicide attempt, post-traumatic stress disorder | If 'x'== 1289   'x'== 1290  |                                                                                                                                 |
|                                       |                            |                                                                                                                                                        | 'x'== 1291   'x'== 1469     |                                                                                                                                 |
|                                       |                            |                                                                                                                                                        |                             |                                                                                                                                 |
| Red meat (servings/week)              | n_1369_0_0                 | (Questionnaire) self-reported frequency of beef, lamb/mutton and pork intake                                                                           | Never = 0                   | Included as part of diet pattern variable                                                                                       |
|                                       | n_1379_0_0                 |                                                                                                                                                        | less than once a week = 0.5 |                                                                                                                                 |
|                                       | n_1389_0_0                 |                                                                                                                                                        | Once a week = 1             |                                                                                                                                 |
|                                       |                            |                                                                                                                                                        | 2-4 times a week = 3        |                                                                                                                                 |
|                                       |                            |                                                                                                                                                        | 5-6 times a week = 5.5      |                                                                                                                                 |
|                                       |                            |                                                                                                                                                        | Once or more daily = 7      |                                                                                                                                 |
| Salt consumption                      | N_1478_0_0                 | (Questionnaire) self-reported frequency of adding salt to the                                                                                          | 1 = never/rearely           | <a href="http://biobank.ndph.ox.ac.uk/showcase/field.cgi?id=1478">http://biobank.ndph.ox.ac.uk/showcase/field.cgi?id=1478</a>   |

|                            |                            |                                                                                                                                   |                                                                                                  |                                                                                                                             |
|----------------------------|----------------------------|-----------------------------------------------------------------------------------------------------------------------------------|--------------------------------------------------------------------------------------------------|-----------------------------------------------------------------------------------------------------------------------------|
|                            |                            | food, not including salt used in cooking.                                                                                         | 2 = sometimes<br>3 = Usually<br>4 = Always                                                       | Those selecting the option "prefer not to answer" in the questionnaire were considered as missings and excluded.            |
| Screen time                | n_1070_0_0 & n_1080_0_0    | (Questionnaire) self-reported time-use of tv-viewing and non-occupational PC-use, h/day                                           | TV-viewing = 0.5 if `x`== 'less than 1h'<br>PC-use = 0.5 if `x`== 'less than 1h'                 |                                                                                                                             |
| Sex                        | n_31_0_0                   | (Registry, updated by participant)                                                                                                |                                                                                                  |                                                                                                                             |
| Sleep duration             | n_1160_0_0                 | (Questionnaire) self-reported hours of sleep/day                                                                                  | Sleep duration = 8 if `x`=='missing'                                                             |                                                                                                                             |
| Smoking                    | n_20116_0_0                | (Questionnaire) self-reported smoking-status                                                                                      |                                                                                                  |                                                                                                                             |
| Stair climbing             | n_943_0_0                  | (Questionnaire) "At home, during the last 4 weeks, about how many times a DAY do you climb a flight of stairs? (approx 10 steps)" | Never = 0<br>1-5 flights/day=1<br>6-10 flights/day=2<br>11-15 flights/day=3<br>≥16 flights/day=4 | <a href="http://biobank.ndph.ox.ac.uk/showcase/field.cgi?id=943">http://biobank.ndph.ox.ac.uk/showcase/field.cgi?id=943</a> |
| Statins use                | n_20003_0_0 – n_20003_0_47 | (Interview) self-reported use of statins                                                                                          | Atorvastatin, Fluvastatin, Pravastatin, Rosuvastatin, Simvastatin                                | <a href="https://www.nhs.uk/conditions/statins/">https://www.nhs.uk/conditions/statins/</a>                                 |
| Substance abuse/dependency | n_20002_0_0 – n_20002_0_28 | (Interview) self-reported alcohol dependency, opioid dependency, other substance abuse/dependency                                 | if `x`==1408   `x`== 1408  <br><br>`x`== 1410                                                    |                                                                                                                             |

|                     |           |                                                                                                                                                                                                                                                           |                                                                                                                                                                                                                                                 |                                                                                                                             |
|---------------------|-----------|-----------------------------------------------------------------------------------------------------------------------------------------------------------------------------------------------------------------------------------------------------------|-------------------------------------------------------------------------------------------------------------------------------------------------------------------------------------------------------------------------------------------------|-----------------------------------------------------------------------------------------------------------------------------|
| Townsend            | n_189_0_0 | Townsend deprivation index calculated immediately prior to participant joining UK Biobank. Based on the preceding national census output areas. Each participant is assigned a score corresponding to the output area in which their postcode is located. |                                                                                                                                                                                                                                                 |                                                                                                                             |
| Walking pace        | n_924_0_0 | (Interview) self-reported usual walking pace                                                                                                                                                                                                              | Slow pace = 1<br>Steady average pace =2<br>Brisk pace =3                                                                                                                                                                                        | <a href="http://biobank.ndph.ox.ac.uk/showcase/field.cgi?id=924">http://biobank.ndph.ox.ac.uk/showcase/field.cgi?id=924</a> |
| Waist circumference | n_48_0_0  | Body size measures                                                                                                                                                                                                                                        | Using the residuals from regressing the waist circumference (cm) on the BMI (kg/m <sup>2</sup> ) and categorization maintaining the sex-specific distribution in the BMI categories as:<br>Low =0<br>medium-low =1<br>medium-high =2<br>high =3 | <a href="https://biobank.ndph.ox.ac.uk/showcase/field.cgi?id=48">https://biobank.ndph.ox.ac.uk/showcase/field.cgi?id=48</a> |

**Supplementary Figure 1. Number of participants in each step of the inclusion and exclusion process. Exclusions due to prevalent diseases at baseline included cancer (excluding non-melanoma skin cancer), cardiovascular diseases, chronic neurological degenerative problems, widespread pain, respiratory diseases (including chronic obstructive pulmonary disease), liver failure or cirrhosis, psychological or psychiatric problems, substance abuse or dependency, or eating disorders.**

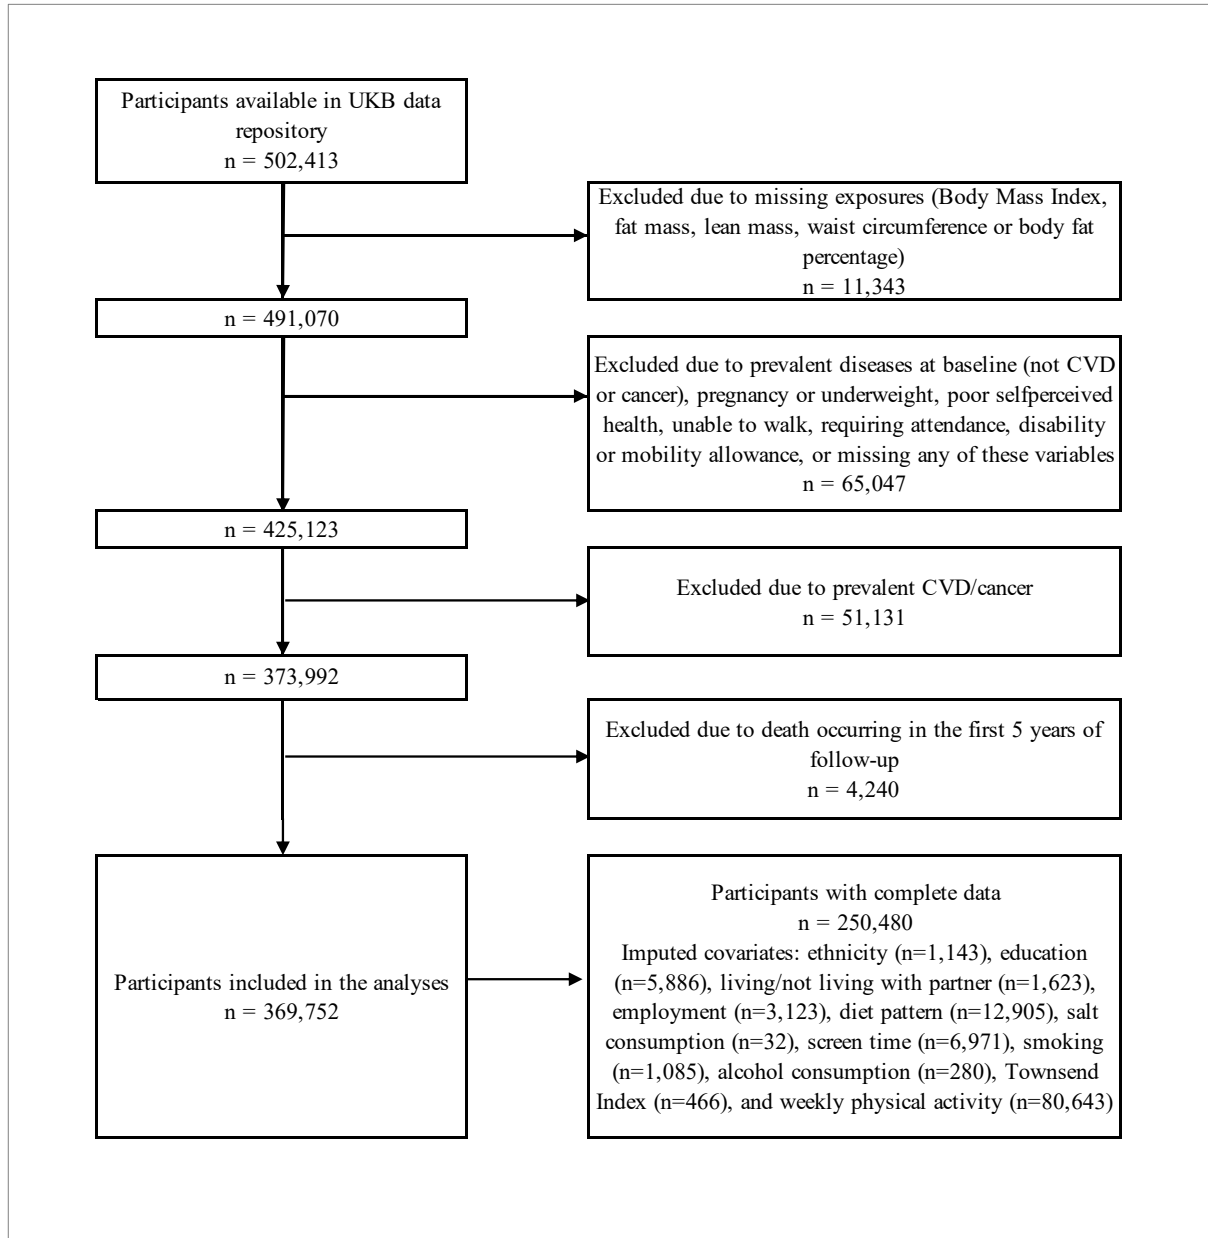



**Supplementary Figure 2. Distribution of deaths by age at death in the total sample (n=369,752; 10,660 deaths).**

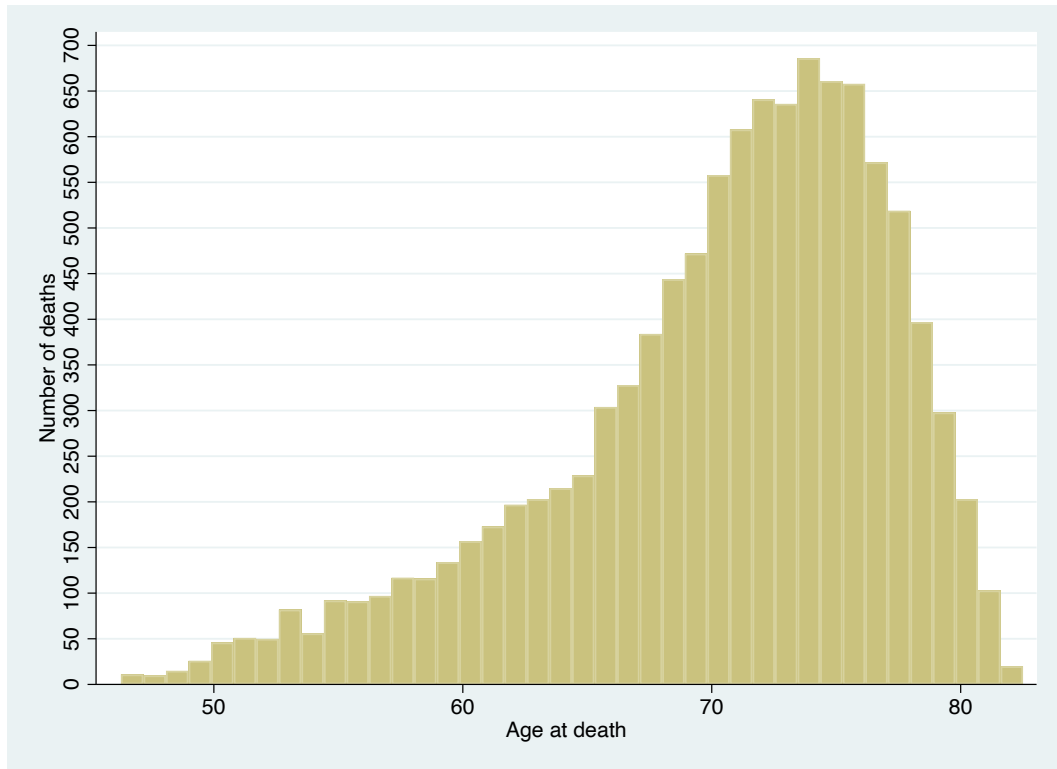

**Supplementary Table 3. Baseline characteristics of the included participants (n=369,752) by strata of Fat Mass Index.**

|                                       | Low<br>(n= 127,236) | Medium-low<br>(n= 161,367) | Medium-high<br>(n= 60,606) | High<br>(n= 20,543) |
|---------------------------------------|---------------------|----------------------------|----------------------------|---------------------|
| Age (years), mean (SD)                | 55.0 (8.2)          | 56.9 (8.0)                 | 57.4 (7.7)                 | 56.5 (7.7)          |
| Age subgroups                         |                     |                            |                            |                     |
| <50 years old                         | 32.3                | 23.4                       | 20.7                       | 23.3                |
| 50-59 years old                       | 34.6                | 33.9                       | 34.6                       | 37.1                |
| 60-69 years old                       | 32.8                | 42.3                       | 44.3                       | 39.2                |
| ≥70 years old                         | 0.3                 | 0.4                        | 0.5                        | 0.4                 |
| Sex, women                            | 65.1                | 46.4                       | 48.7                       | 63.3                |
| Ethnicity                             |                     |                            |                            |                     |
| White                                 | 95.4                | 94.8                       | 94.1                       | 94.1                |
| Asian                                 | 2.1                 | 2.3                        | 2.0                        | 1.3                 |
| Black                                 | 1.0                 | 1.6                        | 2.3                        | 3.0                 |
| Others / Mixed background             | 1.5                 | 1.4                        | 1.5                        | 1.6                 |
| Townsend Deprivation Index, mean (SD) | 2.1 (1.4)           | 2.1 (1.4)                  | 2.0 (1.4)                  | 1.8 (1.4)           |
| Education                             |                     |                            |                            |                     |
| No qualifications                     | 10.1                | 15.0                       | 18.8                       | 19.3                |
| Not college/university degree         | 47.5                | 51.5                       | 53.5                       | 55.4                |
| University degree                     | 42.4                | 33.5                       | 27.7                       | 25.3                |
| Living with partner                   | 73.9                | 76.9                       | 74.7                       | 67.8                |
| Employment                            |                     |                            |                            |                     |
| Unemployed                            | 6.7                 | 5.0                        | 5.5                        | 7.5                 |
| Employed                              | 67.5                | 62.7                       | 61.3                       | 62.2                |
| Retired                               | 25.9                | 32.3                       | 33.2                       | 30.3                |
| Total PA (MET-min/week), mean (SD)    | 2935.4 (2696.4)     | 2689.3 (2644.8)            | 2392.8 (2354.0)            | 2043.5 (2354.0)     |
| Diet pattern, meeting 2 targets       | 73.3                | 68.4                       | 65.1                       | 63.4                |
| Salt intake                           |                     |                            |                            |                     |
| Never / Rarely                        | 60.3                | 55.5                       | 52.4                       | 51.4                |
| Sometimes                             | 26.4                | 28.5                       | 29.6                       | 29.9                |
| Usually                               | 9.7                 | 11.7                       | 13.0                       | 12.9                |
| Always                                | 3.6                 | 4.3                        | 5.1                        | 5.8                 |
| Alcohol intake                        |                     |                            |                            |                     |
| Never                                 | 3.5                 | 3.6                        | 4.4                        | 5.7                 |
| Previous                              | 2.5                 | 2.4                        | 2.9                        | 3.9                 |
| Current, <3 times/week                | 46.0                | 46.5                       | 51.6                       | 61.0                |
| Current, ≥3 times/week                | 48.0                | 47.5                       | 41.1                       | 29.4                |
| Smoking status                        |                     |                            |                            |                     |
| Never                                 | 61.6                | 56.3                       | 53.1                       | 54.9                |
| Previous                              | 28.5                | 34.5                       | 38.3                       | 37.2                |
| Current                               | 9.9                 | 9.2                        | 8.6                        | 7.8                 |
| Screen time                           |                     |                            |                            |                     |
| <2 hours / day                        | 18.4                | 9.6                        | 6.5                        | 5.0                 |
| 2-3 hours / day                       | 23.6                | 18.1                       | 14.0                       | 12.0                |
| 3-4 hours / day                       | 23.3                | 23.3                       | 21.5                       | 19.2                |
| 4-5 hours / day                       | 16.4                | 20.6                       | 21.5                       | 21.2                |
| >5 hours / day                        | 18.2                | 28.4                       | 36.4                       | 42.7                |
| History of depression                 | 4.0                 | 4.3                        | 5.2                        | 7.2                 |

Number varies from 289,109 (total physical activity) to 369,752 because of missing data. MET: metabolic equivalent; MIN: minutes; PA: physical activity. Values are percentages unless stated otherwise. Dietary pattern is based on meeting at least two out of three healthy eating targets related to food types: 1) ≤3 weekly servings of red meat and ≤1 servings/week of processed meat; 2) ≥2 servings per week of fish including at least one with oily fish; 3) ≥5 servings per day of fruits and vegetables.

**Supplementary Table 4. Baseline characteristics of the included participants (n=369,752) by strata of Lean Mass Index.**

|                                       | <b>Low<br/>(n=127,099)</b> | <b>Medium-low<br/>(n=161,564)</b> | <b>Medium-high<br/>(n=60,518)</b> | <b>High<br/>(n=20,571)</b> |
|---------------------------------------|----------------------------|-----------------------------------|-----------------------------------|----------------------------|
| Age (years), mean (SD)                | 56.9 (8.0)                 | 56.3 (8.1)                        | 55.6 (7.8)                        | 54.7 (7.8)                 |
| Age subgroups                         |                            |                                   |                                   |                            |
| <50 years old                         | 23.5                       | 26.2                              | 28.9                              | 31.7                       |
| 50-59 years old                       | 34.0                       | 34.0                              | 35.3                              | 37.5                       |
| 60-69 years old                       | 42.0                       | 39.4                              | 35.4                              | 30.6                       |
| ≥70 years old                         | 0.5                        | 0.4                               | 0.4                               | 0.3                        |
| Sex, women                            | 65.1                       | 46.4                              | 48.6                              | 63.3                       |
| Ethnicity                             |                            |                                   |                                   |                            |
| White                                 | 95.0                       | 95.2                              | 94.4                              | 93.2                       |
| Asian                                 | 2.8                        | 1.9                               | 1.5                               | 1.1                        |
| Black                                 | 0.9                        | 1.5                               | 2.4                               | 3.8                        |
| Others / Mixed background             | 1.3                        | 1.4                               | 1.7                               | 1.8                        |
| Townsend Deprivation Index, mean (SD) | 2.2 (1.4)                  | 2.1 (1.4)                         | 2.0 (1.4)                         | 1.8 (1.4)                  |
| Education                             |                            |                                   |                                   |                            |
| No qualifications                     | 13.1                       | 14.3                              | 15.8                              | 15.8                       |
| Not college/university degree         | 48.5                       | 50.4                              | 53.8                              | 56.6                       |
| University degree                     | 38.5                       | 35.3                              | 30.4                              | 27.6                       |
| Living with partner                   | 74.8                       | 76.5                              | 74.0                              | 67.7                       |
| Employment                            |                            |                                   |                                   |                            |
| Unemployed                            | 6.3                        | 5.2                               | 5.6                               | 7.4                        |
| Employed                              | 59.9                       | 65.0                              | 68.4                              | 69.9                       |
| Retired                               | 33.8                       | 29.8                              | 26.0                              | 22.7                       |
| Total PA (MET-min/week), mean (SD)    | 2648.5 (2517.7)            | 2766.6 (2687.4)                   | 2716.8 (2583.8)                   | 2352.0 (2583.8)            |
| Diet pattern, meeting 2 targets       | 72.4                       | 68.6                              | 66.1                              | 64.3                       |
| Salt intake                           |                            |                                   |                                   |                            |
| Never / Rarely                        | 58.5                       | 56.0                              | 54.3                              | 52.9                       |
| Sometimes                             | 27.1                       | 28.3                              | 29.1                              | 29.7                       |
| Usually                               | 10.5                       | 11.6                              | 11.9                              | 12.2                       |
| Always                                | 3.9                        | 4.2                               | 4.8                               | 5.2                        |
| Alcohol intake                        |                            |                                   |                                   |                            |
| Never                                 | 3.9                        | 3.4                               | 4.2                               | 5.8                        |
| Previous                              | 2.5                        | 2.4                               | 2.9                               | 3.6                        |
| Current, <3 times/week                | 45.2                       | 46.6                              | 52.6                              | 62.4                       |
| Current, ≥3 times/week                | 48.4                       | 47.6                              | 40.4                              | 28.2                       |
| Smoking status                        |                            |                                   |                                   |                            |
| Never                                 | 60.2                       | 56.3                              | 55.1                              | 57.5                       |
| Previous                              | 30.5                       | 34.3                              | 35.5                              | 34.1                       |
| Current                               | 9.2                        | 9.3                               | 9.4                               | 8.4                        |
| Screen time                           |                            |                                   |                                   |                            |
| <2 hours / day                        | 14.8                       | 11.4                              | 8.9                               | 6.9                        |
| 2-3 hours / day                       | 21.0                       | 18.9                              | 16.8                              | 14.5                       |
| 3-4 hours / day                       | 23.4                       | 22.8                              | 21.9                              | 20.8                       |
| 4-5 hours / day                       | 18.1                       | 19.7                              | 20.5                              | 20.8                       |
| >5 hours / day                        | 22.6                       | 27.2                              | 32.0                              | 37.0                       |
| History of depression                 | 4.3                        | 4.2                               | 4.9                               | 6.6                        |

Number varies from 289,109 (total physical activity) to 369,752 because of missing data. MET: metabolic equivalent; MIN: minutes; PA: physical activity. Values are percentages unless stated otherwise. Dietary pattern is based on meeting at least two out of three healthy eating targets related to food types: 1) ≤3 weekly servings of red meat and ≤1 servings/week of processed meat; 2) ≥2 servings per week of fish including at least one with oily fish; 3) ≥5 servings per day of fruits and vegetables.

**Supplementary Table 5. Baseline characteristics of the included participants (n=369,752) by strata of waist circumference.**

|                                       | Low<br>(n=127,224) | Medium-low<br>(n=161,377) | Medium-high<br>(n=60,604) | High<br>(n=20,547) |
|---------------------------------------|--------------------|---------------------------|---------------------------|--------------------|
| Age (years), mean (SD)                | 55.0 (8.1)         | 56.5 (8.0)                | 57.9 (7.6)                | 58.7 (7.6)         |
| Age subgroups                         |                    |                           |                           |                    |
| <50 years old                         | 32.0               | 25.2                      | 19.1                      | 15.9               |
| 50-59 years old                       | 35.0               | 34.6                      | 33.4                      | 32.8               |
| 60-69 years old                       | 32.7               | 39.8                      | 47.1                      | 50.6               |
| ≥70 years old                         | 0.3                | 0.4                       | 0.5                       | 0.7                |
| Sex, women                            | 65.2               | 46.4                      | 48.6                      | 63.3               |
| Ethnicity                             |                    |                           |                           |                    |
| White                                 | 94.3               | 95.1                      | 95.3                      | 94.8               |
| Asian                                 | 1.9                | 2.2                       | 2.3                       | 2.7                |
| Black                                 | 2.1                | 1.3                       | 1.2                       | 1.2                |
| Others / Mixed background             | 1.6                | 1.4                       | 1.2                       | 1.3                |
| Townsend Deprivation Index, mean (SD) | 2.1 (1.4)          | 2.1 (1.4)                 | 2.1 (1.4)                 | 2.0 (1.4)          |
| Education                             |                    |                           |                           |                    |
| No qualifications                     | 13.0               | 14.0                      | 16.2                      | 18.0               |
| Not college/university degree         | 52.1               | 49.9                      | 49.7                      | 50.2               |
| University degree                     | 35.0               | 36.1                      | 34.1                      | 31.8               |
| Living with partner                   | 74.2               | 75.9                      | 75.2                      | 71.7               |
| Employment                            |                    |                           |                           |                    |
| Unemployed                            | 6.1                | 5.5                       | 5.7                       | 6.6                |
| Employed                              | 67.6               | 64.4                      | 59.0                      | 55.0               |
| Retired                               | 26.3               | 30.2                      | 35.3                      | 38.4               |
| Total PA (MET-min/week), mean (SD)    | 2887.7 (2714.7)    | 2687.1 (2640.5)           | 2450.6 (2376.8)           | 2283.7 (2376.8)    |
| Diet pattern, meeting 2 targets       | 72.1               | 68.1                      | 66.7                      | 68.1               |
| Salt intake                           |                    |                           |                           |                    |
| Never / Rarely                        | 57.8               | 56.3                      | 54.7                      | 53.9               |
| Sometimes                             | 27.7               | 28.2                      | 28.4                      | 28.1               |
| Usually                               | 10.5               | 11.4                      | 12.1                      | 12.9               |
| Always                                | 4.0                | 4.1                       | 4.8                       | 5.1                |
| Alcohol intake                        |                    |                           |                           |                    |
| Never                                 | 4.2                | 3.4                       | 3.7                       | 5.0                |
| Previous                              | 2.6                | 2.4                       | 2.8                       | 3.3                |
| Current, <3 times/week                | 51.8               | 45.9                      | 45.4                      | 47.9               |
| Current, ≥3 times/week                | 41.4               | 48.2                      | 48.2                      | 43.7               |
| Smoking status                        |                    |                           |                           |                    |
| Never                                 | 62.3               | 56.4                      | 52.6                      | 51.5               |
| Previous                              | 29.7               | 34.1                      | 36.7                      | 37.7               |
| Current                               | 8.0                | 9.5                       | 10.7                      | 10.8               |
| Screen time                           |                    |                           |                           |                    |
| <2 hours / day                        | 13.2               | 11.8                      | 10.1                      | 9.3                |
| 2-3 hours / day                       | 20.4               | 18.9                      | 17.2                      | 16.6               |
| 3-4 hours / day                       | 23.2               | 22.8                      | 22.3                      | 21.7               |
| 4-5 hours / day                       | 18.8               | 19.4                      | 20.0                      | 20.0               |
| >5 hours / day                        | 24.3               | 27.1                      | 30.4                      | 32.4               |
| History of depression                 | 4.3                | 4.3                       | 5.0                       | 5.9                |

Number varies from 289,109 (total physical activity) to 369,752 because of missing data. MET: metabolic equivalent; MIN: minutes; PA: physical activity. Values are percentages unless stated otherwise. Dietary pattern is based on meeting at least two out of three healthy eating targets related to food types: 1) ≤3 weekly servings of red meat and ≤1 servings/week of processed meat; 2) ≥2 servings per week of fish including at least one with oily fish; 3) ≥5 servings per day of fruits and vegetables.

**Supplementary Table 6. Baseline characteristics of the included participants (n=369,752) by strata of Body Fat Percentage.**

|                                       | Low<br>(n=127,495) | Medium-low<br>(n=162,400) | Medium-high<br>(n=59,574) | High<br>(n=20,283) |
|---------------------------------------|--------------------|---------------------------|---------------------------|--------------------|
| Age (years), mean (SD)                | 54.7 (8.2)         | 56.8 (8.0)                | 57.9 (7.7)                | 57.6 (7.7)         |
| Age subgroups                         |                    |                           |                           |                    |
| <50 years old                         | 33.5               | 23.7                      | 18.7                      | 19.3               |
| 50-59 years old                       | 34.6               | 34.2                      | 34.0                      | 35.8               |
| 60-69 years old                       | 31.6               | 41.7                      | 46.8                      | 44.4               |
| ≥70 years old                         | 0.3                | 0.4                       | 0.5                       | 0.5                |
| Sex, women                            | 65.2               | 46.3                      | 48.5                      | 64.0               |
| Ethnicity                             |                    |                           |                           |                    |
| White                                 | 95.4               | 94.8                      | 94.1                      | 94.1               |
| Asian                                 | 2.0                | 2.3                       | 2.3                       | 1.6                |
| Black                                 | 1.1                | 1.6                       | 2.2                       | 2.8                |
| Others / Mixed background             | 1.5                | 1.4                       | 1.5                       | 1.5                |
| Townsend Deprivation Index, mean (SD) | 2.1 (1.4)          | 2.1 (1.4)                 | 2.0 (1.4)                 | 1.8 (1.4)          |
| Education                             |                    |                           |                           |                    |
| No qualifications                     | 10.1               | 14.9                      | 19.0                      | 20.9               |
| Not college/university degree         | 47.8               | 51.4                      | 53.3                      | 54.5               |
| University degree                     | 42.1               | 33.7                      | 27.7                      | 24.6               |
| Living with partner                   | 73.8               | 76.8                      | 74.9                      | 69.0               |
| Employment                            |                    |                           |                           |                    |
| Unemployed                            | 6.7                | 5.0                       | 5.4                       | 7.5                |
| Employed                              | 68.5               | 63.2                      | 59.1                      | 57.5               |
| Retired                               | 24.8               | 31.8                      | 35.5                      | 35.0               |
| Total PA (MET-min/week), mean (SD)    | 2978.1 (2724.6)    | 2669.8 (2633.9)           | 2350.7 (2305.2)           | 2011.3 (2305.2)    |
| Diet pattern, meeting 2 targets       | 73.3               | 68.2                      | 65.1                      | 64.6               |
| Salt intake                           |                    |                           |                           |                    |
| Never / Rarely                        | 60.3               | 55.5                      | 52.3                      | 51.2               |
| Sometimes                             | 26.4               | 28.6                      | 29.5                      | 29.7               |
| Usually                               | 9.7                | 11.7                      | 13.0                      | 13.2               |
| Always                                | 3.6                | 4.2                       | 5.1                       | 5.9                |
| Alcohol intake                        |                    |                           |                           |                    |
| Never                                 | 3.5                | 3.6                       | 4.3                       | 5.5                |
| Previous                              | 2.5                | 2.4                       | 3.0                       | 3.9                |
| Current, <3 times/week                | 46.6               | 46.6                      | 50.6                      | 59.3               |
| Current, ≥3 times/week                | 47.4               | 47.3                      | 42.1                      | 31.3               |
| Smoking status                        |                    |                           |                           |                    |
| Never                                 | 61.5               | 56.5                      | 53.0                      | 53.8               |
| Previous                              | 28.6               | 34.3                      | 38.5                      | 38.4               |
| Current                               | 9.9                | 9.2                       | 8.5                       | 7.8                |
| Screen time                           |                    |                           |                           |                    |
| <2 hours / day                        | 18.5               | 9.6                       | 6.3                       | 4.8                |
| 2-3 hours / day                       | 23.6               | 18.2                      | 13.9                      | 11.3               |
| 3-4 hours / day                       | 23.3               | 23.3                      | 21.4                      | 19.2               |
| 4-5 hours / day                       | 16.3               | 20.6                      | 21.6                      | 21.6               |
| >5 hours / day                        | 18.2               | 28.3                      | 36.8                      | 43.0               |
| History of depression                 | 4.0                | 4.3                       | 5.4                       | 7.1                |

Number varies from 289,109 (total physical activity) to 369,752 because of missing data. MET: metabolic equivalent; MIN: minutes; PA: physical activity. Values are percentages unless stated otherwise. Dietary pattern is based on meeting at least two out of three healthy eating targets related to food types: 1) ≤3 weekly servings of red meat and ≤1 servings/week of processed meat; 2) ≥2 servings per week of fish including at least one with oily fish; 3) ≥5 servings per day of fruits and vegetables.

**Supplementary Table 7. Bivariate correlations of Body Mass Index (BMI) with Fat Mass Index (FMI), Lean Mass Index (LMI) and Body Fat Percentage (BFP) by sex and age strata.**

|                        | BMI-FMI | BMI-LMI | BMI-BFP | FMI-LMI |
|------------------------|---------|---------|---------|---------|
| Women                  | 0.97    | 0.85    | 0.85    | 0.70    |
| Men                    | 0.93    | 0.87    | 0.79    | 0.62    |
| Women, <50 years old   | 0.98    | 0.87    | 0.86    | 0.73    |
| Women, 50-59 years old | 0.97    | 0.87    | 0.85    | 0.72    |
| Women, 60-69 years old | 0.97    | 0.85    | 0.84    | 0.67    |
| Women, ≥ 70 years old  | 0.96    | 0.84    | 0.81    | 0.65    |
| Men, <50 years old     | 0.94    | 0.90    | 0.80    | 0.67    |
| Men, 50-59 years old   | 0.94    | 0.89    | 0.81    | 0.67    |
| Men, 60-69 years old   | 0.93    | 0.86    | 0.79    | 0.61    |
| Men, ≥ 70 years old    | 0.93    | 0.87    | 0.78    | 0.59    |

**Supplementary Figure 3. All-cause mortality hazard ratio's variations across age by categories of waist circumference-body mass index residuals and body fat percentage.** Results adjusted for age (as time-scale), sex, ethnicity, education, living/not living with partner, employment, diet pattern, salt consumption, screen time, smoking, alcohol consumption, depression, Townsend Index and weekly physical activity. The model for body fat percentage was also adjusted by the Lean Mass Index.

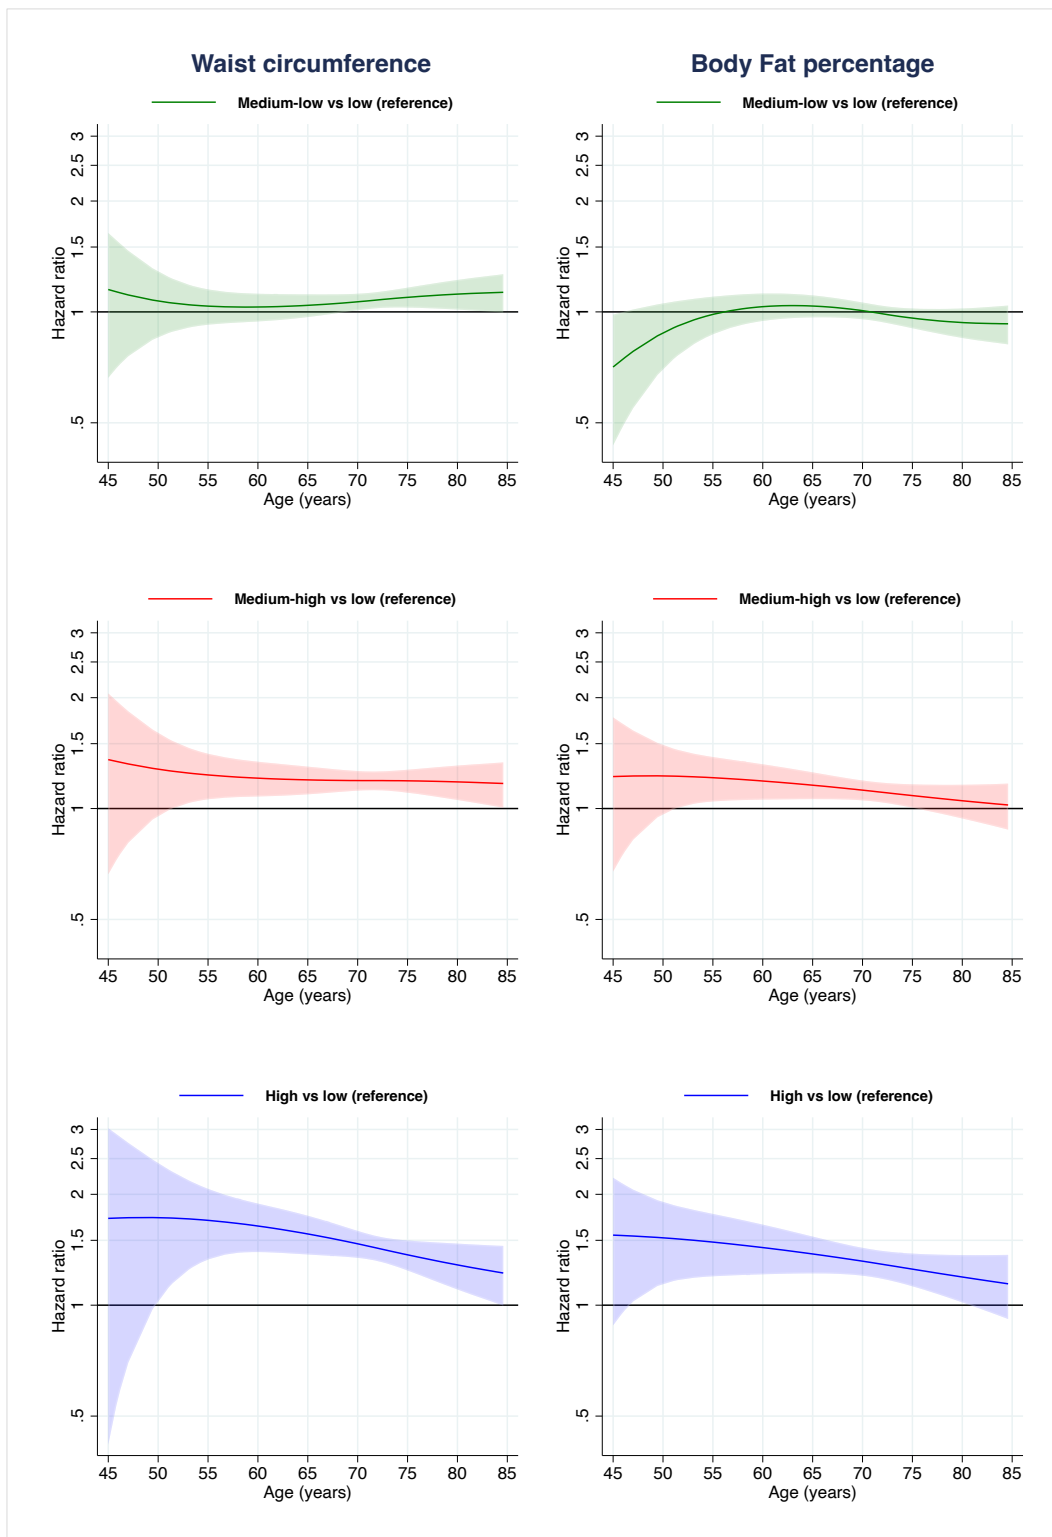

**Supplementary Figure 4. All-cause mortality hazard ratio's variations across age across categories of Body Mass Index, Fat Mass Index, Lean Mass Index, waist circumference and body fat percentage, stratified for women (n=200,201) and men (n=169,551).** Results adjusted for age (as time-scale), ethnicity, education, living/not living with partner, employment, diet pattern, salt consumption, screen time, smoking, alcohol consumption, depression, Townsend Index and weekly physical activity. Fat Mass Index and Body fat percentage were adjusted for Lean Mass Index, which was adjusted for Fat Mass Index. BFP: body fat percentage; BMI: body mass index; FMI: fat mass index; LMI: lean mass index; Ref: reference; WC: waist circumference.

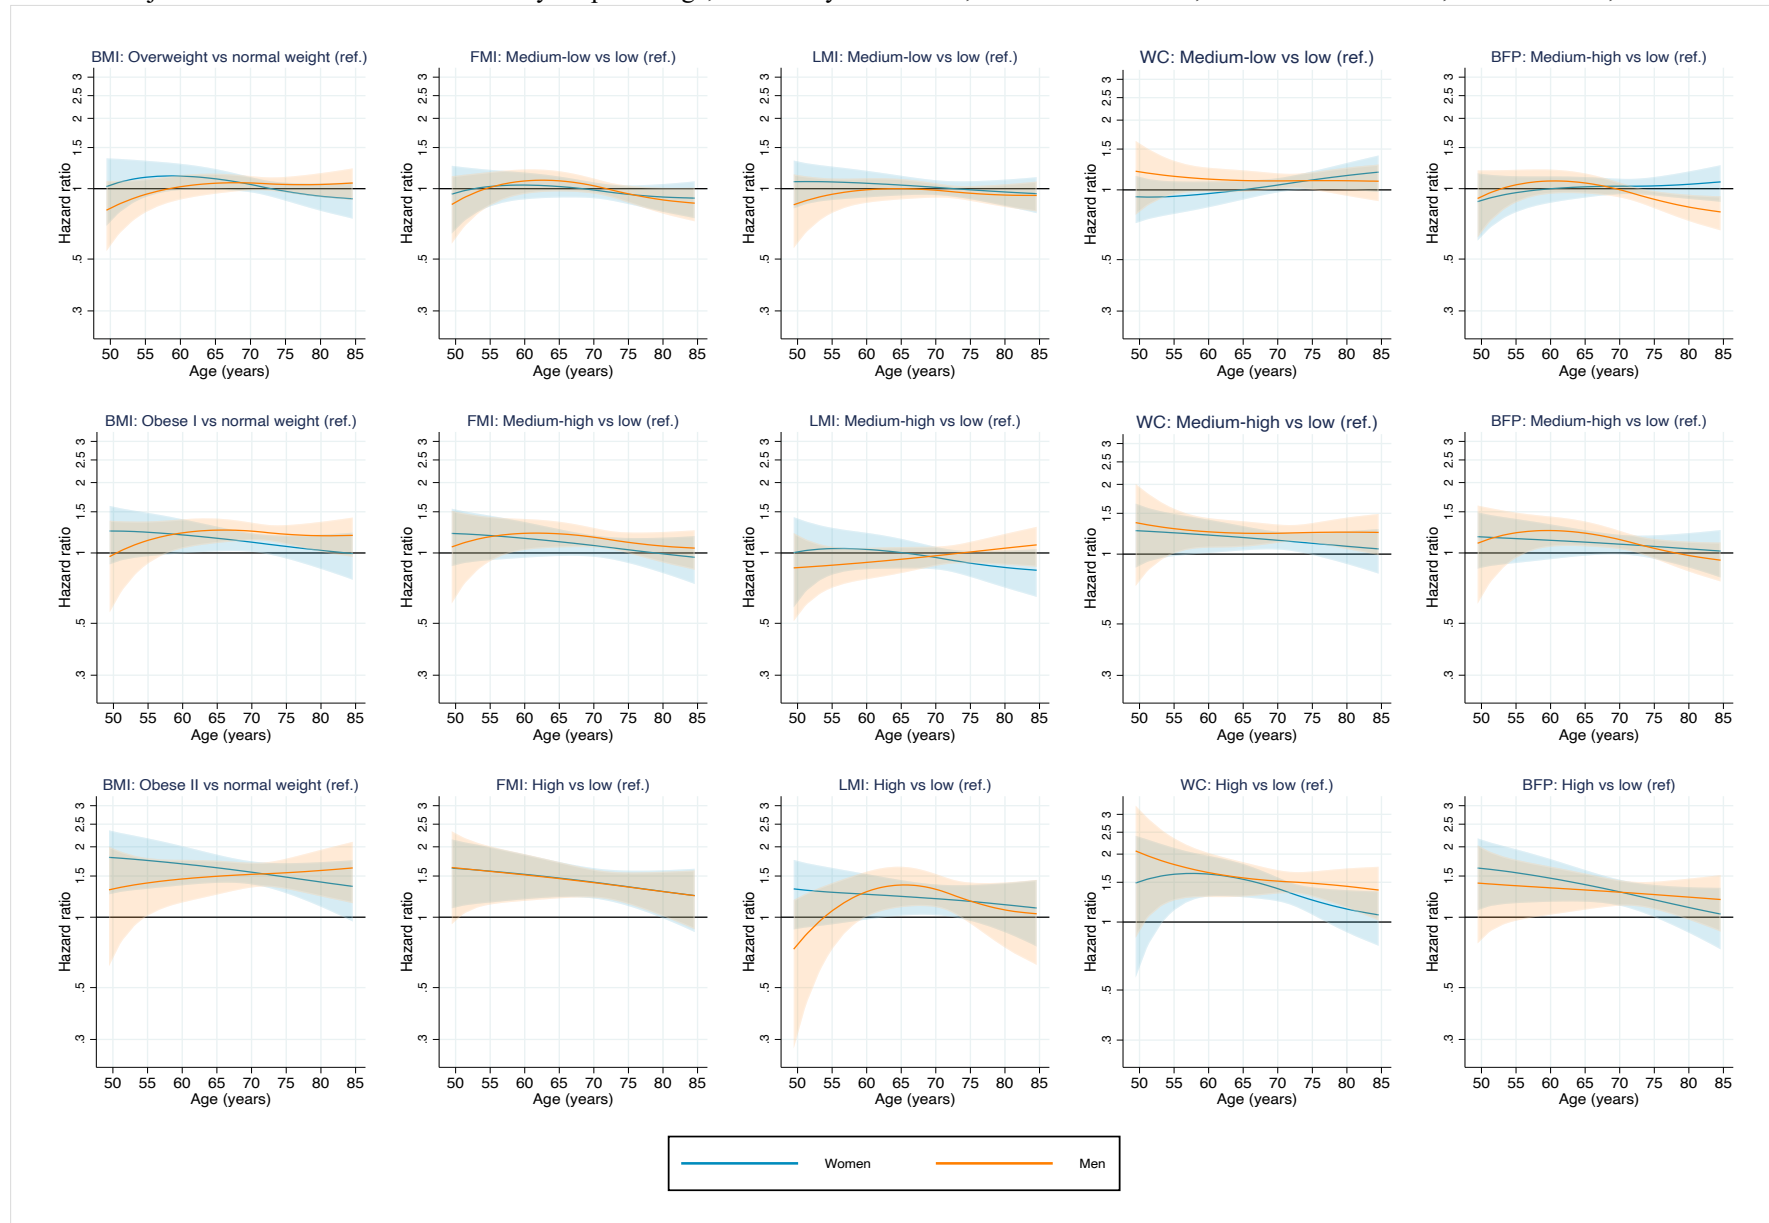



**Supplementary Figure 5. All-cause mortality hazard ratios' variations across age and categories of waist circumference and body fat percentage, in never smokers (n=212,071).** Results adjusted for age (as time-scale), sex, ethnicity, education, living/not living with partner, employment, diet pattern, salt consumption, screen time, alcohol consumption, depression, Townsend Index and weekly physical activity. The model for body fat percentage was also adjusted by the Lean Mass Index.

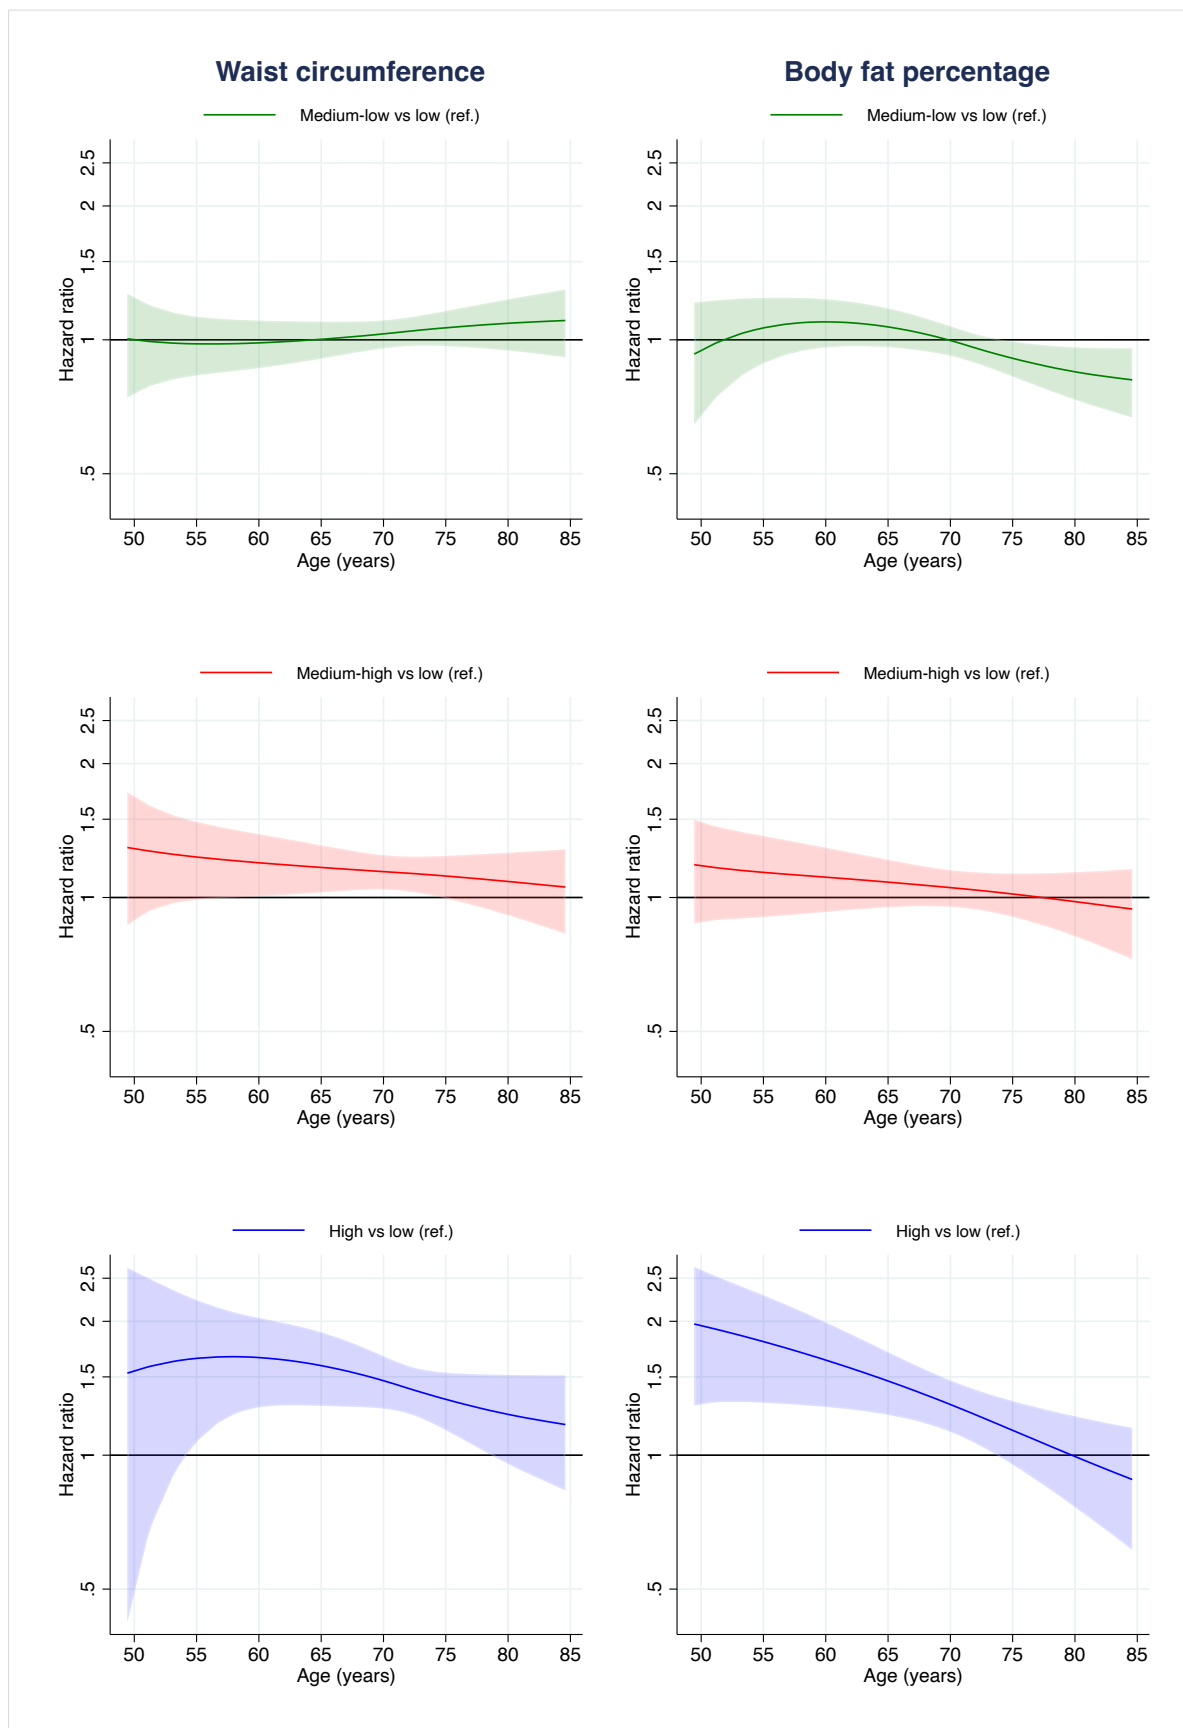

**Supplementary Figure 6. All-cause mortality hazard ratios's variations across age and categories of Body Mass Index, Fat Mass Index, Lean Mass Index, waist circumference and body fat percentage, in people who reported no weight change in previous year to the baseline assessment (n=210,872).** Results adjusted for age (as time-scale), sex, ethnicity, education, living/not living with partner, employment, diet pattern, salt consumption, screen time, smoking, alcohol consumption, depression, Townsend Index and weekly physical activity. Fat Mass Index and body fat percentage were adjusted for Lean Mass Index, which was adjusted for Fat Mass Index.

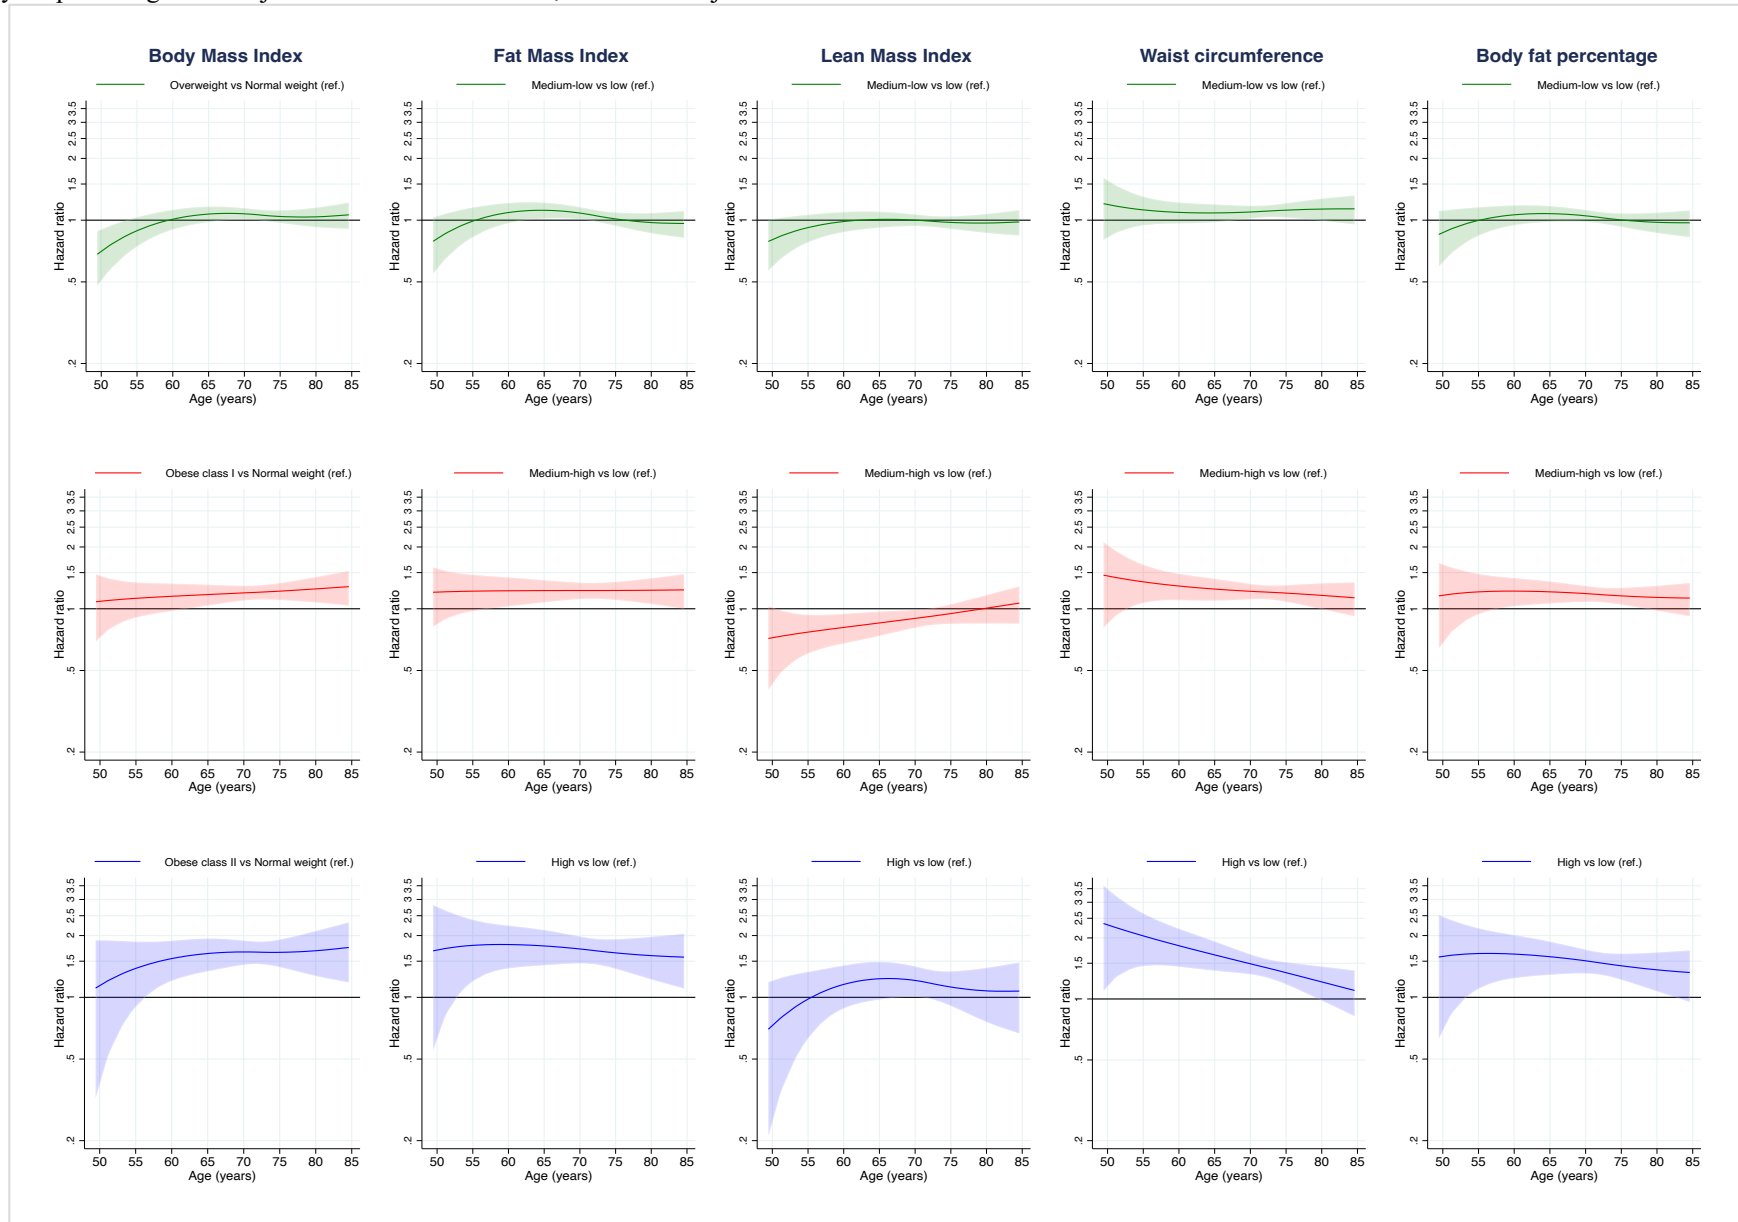

Supplement: 41366_2023_1314_MOESM1_ESM.pdf [file 41366_2023_1314_MOESM1_ESM.pdf]
